# Supplementary material for: Facile N9-Alkylation of Xanthine Derivatives and Their Use as Precursors for N-Heterocyclic Carbene Complexes
Source: MDPI journal article supplement (doi:10.3390/molecules26123705), 2021-06-17
Supplement: s1 [file s1]

## Supplementary Material

### **Facile N9-alkylation of xanthine derivatives and their use as precursors for N-heterocyclic carbene complexes.**

Moloud Mokfi <sup>1</sup>, Jörg Rust <sup>2</sup>, Christian W. Lehmann <sup>2</sup> and Fabian Mohr <sup>1,\*</sup>

<sup>1</sup> Fakultät für Mathematik und Naturwissenschaften, Anorganische Chemie, Bergische Universität Wuppertal, Gaußstr. 20, 42119 Wuppertal, Germany.

<sup>2</sup> Chemische Kristallographie und Elektronenmikroskopie, Max-Planck-Institut für Kohlenforschung, Kaiser-Wilhelm-Platz 1, 45470 Mülheim an der Ruhr, Germany.

#### **Contents**

Table S1.            Crystallographic and refinement details.

Figures S1-S70.    NMR spectra of the compounds.

Table S1. Crystallographic and refinement details.

|                                               | [Ag(NHC)(NH <sub>3</sub> )]PF <sub>6</sub> ( <b>5</b> )                            | [Ag(NHC) <sub>2</sub> ]PF <sub>6</sub> ( <b>7</b> )                              | [AgCl(NHC)]·( <b>9</b> )                                                                      | [AgCl(NHC)]·( <b>10</b> )                                                                      | [AuCl(NHC)]·( <b>12</b> )                                          | [AuCl(NHC)]·( <b>13</b> )                                                        |
|-----------------------------------------------|------------------------------------------------------------------------------------|----------------------------------------------------------------------------------|-----------------------------------------------------------------------------------------------|------------------------------------------------------------------------------------------------|--------------------------------------------------------------------|----------------------------------------------------------------------------------|
| CCDC code                                     | 2073071                                                                            | 2073072                                                                          | 2073073                                                                                       | 2075635                                                                                        | 2073074                                                            | 2073075                                                                          |
| Empirical formula                             | C <sub>16</sub> H <sub>20</sub> ClF <sub>6</sub> N <sub>5</sub> O <sub>2</sub> PAg | C <sub>32</sub> H <sub>36</sub> F <sub>6</sub> N <sub>8</sub> O <sub>4</sub> PAg | C <sub>32</sub> H <sub>36</sub> Cl <sub>2</sub> N <sub>8</sub> O <sub>4</sub> Ag <sub>2</sub> | C <sub>48</sub> H <sub>51</sub> Cl <sub>6</sub> N <sub>12</sub> O <sub>6</sub> Ag <sub>3</sub> | C <sub>16</sub> H <sub>18</sub> ClN <sub>4</sub> O <sub>2</sub> Au | C <sub>16</sub> H <sub>17</sub> Cl <sub>2</sub> N <sub>4</sub> O <sub>2</sub> Au |
| Formula weight                                | 602.66                                                                             | 849.53                                                                           | 883.33                                                                                        | 1428.32                                                                                        | 530.76                                                             | 565.20                                                                           |
| Crystal system                                | Orthorhombic                                                                       | Orthorhombic                                                                     | Triclinic                                                                                     | Triclinic                                                                                      | Monoclinic                                                         | Monoclinic                                                                       |
| Space group                                   | Pna2 <sub>1</sub>                                                                  | Pca2 <sub>1</sub>                                                                | P-1                                                                                           | P-1                                                                                            | P2 <sub>1</sub> /n                                                 | P2 <sub>1</sub> /n                                                               |
| a/Å                                           | 18.2489(4)                                                                         | 20.7353(5)                                                                       | 8.7313(5)                                                                                     | 12.7960(4)                                                                                     | 11.3106(2)                                                         | 11.5439(4)                                                                       |
| b/Å                                           | 13.0368(3)                                                                         | 10.7229(2)                                                                       | 10.1183(6)                                                                                    | 14.2460(6)                                                                                     | 9.1372(2)                                                          | 9.3535(4)                                                                        |
| c/Å                                           | 9.0580(3)                                                                          | 15.4374(4)                                                                       | 11.1408(6)                                                                                    | 17.7630(8)                                                                                     | 16.0606(4)                                                         | 16.3214(6)                                                                       |
| α/°                                           | 90                                                                                 | 90                                                                               | 107.453(5)                                                                                    | 112.002(2)                                                                                     | 90                                                                 | 90                                                                               |
| β/°                                           | 90                                                                                 | 90                                                                               | 103.485(5)                                                                                    | 97.983(5)                                                                                      | 91.485(2)                                                          | 92.204(4)                                                                        |
| γ/°                                           | 90                                                                                 | 90                                                                               | 104.032(5)                                                                                    | 100.642(6)                                                                                     | 90                                                                 | 90                                                                               |
| Volume/Å <sup>3</sup>                         | 2154.97(9)                                                                         | 3432.37(15)                                                                      | 859.72(10)                                                                                    | 2872.6(2)                                                                                      | 1659.26(6)                                                         | 1761.01(12)                                                                      |
| Z                                             | 4                                                                                  | 4                                                                                | 1                                                                                             | 2                                                                                              | 4                                                                  | 4                                                                                |
| ρ <sub>calc</sub> mg/mm <sup>3</sup>          | 1.858                                                                              | 1.644                                                                            | 1.706                                                                                         | 1.651                                                                                          | 2.125                                                              | 2.132                                                                            |
| μ/mm <sup>-1</sup>                            | 1.210                                                                              | 0.717                                                                            | 1.344                                                                                         | 0.932                                                                                          | 9.044                                                              | 8.675                                                                            |
| F(000)                                        | 1200.0                                                                             | 1728.0                                                                           | 444.0                                                                                         | 1428                                                                                           | 1016.0                                                             | 1080.0                                                                           |
| Crystal size/mm <sup>3</sup>                  | 0.02 × 0.05 × 0.10                                                                 | 0.04 × 0.08 × 0.13                                                               | 0.03 × 0.06 × 0.12                                                                            | 0.04 × 0.08 × 0.09                                                                             | 0.03 × 0.09 × 0.10                                                 | 0.04 × 0.04 × 0.06                                                               |
| 2θ range                                      | 5.476 to 59.024°                                                                   | 5.026 to 59.06°                                                                  | 4.778 to 59.056°                                                                              | 1.108 to 26.902°                                                                               | 5.13 to 58.766°                                                    | 4.996 to 58.462°                                                                 |
| Reflections collected                         | 7489                                                                               | 11608                                                                            | 7649                                                                                          | 60327                                                                                          | 8241                                                               | 9461                                                                             |
| Independent reflections                       | 3933                                                                               | 6284                                                                             | 4014                                                                                          | 17428                                                                                          | 3825                                                               | 4061                                                                             |
| Data/restraints/parameters                    | 3933/235/348                                                                       | 6284/1/494                                                                       | 4014/0/220                                                                                    | 17428/0/686                                                                                    | 3825/0/220                                                         | 4061/0/229                                                                       |
| Goodness-of-fit on F <sup>2</sup>             | 1.028                                                                              | 1.052                                                                            | 1.066                                                                                         | 1.031                                                                                          | 1.064                                                              | 1.029                                                                            |
| Final R indices [I>2σ(I)]                     | R <sub>1</sub> = 0.0348<br>wR <sub>2</sub> = 0.0786                                | R <sub>1</sub> = 0.0347<br>wR <sub>2</sub> = 0.0705                              | R <sub>1</sub> = 0.0294<br>wR <sub>2</sub> = 0.0634                                           | R <sub>1</sub> = 0.0558<br>wR <sub>2</sub> = 0.1522                                            | R <sub>1</sub> = 0.0246<br>wR <sub>2</sub> = 0.0493                | R <sub>1</sub> = 0.0243<br>wR <sub>2</sub> = 0.0403                              |
| Largest difference peak/hole/eÅ <sup>-3</sup> | 0.67/-0.53                                                                         | 0.65/-0.82                                                                       | 0.48/-0.33                                                                                    | 2.2/-2.5                                                                                       | 1.29/-0.91                                                         | 0.69/-1.10                                                                       |

Table S1 continued. Crystallographic and refinement details.

|                                               | [AuCl(NHC)]·(14)                                                   | [RuCl <sub>2</sub> (NHC)(p-cym)] (15)                                                         | [Cp*RhCl <sub>2</sub> (NHC)] (18)                                                | [Cp*RhCl <sub>2</sub> (NHC)] (19)                                                | [RhCl(NHC)(cod)]·(22)                                                            |
|-----------------------------------------------|--------------------------------------------------------------------|-----------------------------------------------------------------------------------------------|----------------------------------------------------------------------------------|----------------------------------------------------------------------------------|----------------------------------------------------------------------------------|
| CCDC code                                     | 2073076                                                            | 2075634                                                                                       | 2073077                                                                          | 2073078                                                                          | 2073079                                                                          |
| Empirical formula                             | C <sub>10</sub> H <sub>14</sub> ClN <sub>4</sub> O <sub>2</sub> Au | C <sub>53</sub> H <sub>65</sub> Cl <sub>7</sub> N <sub>8</sub> O <sub>4</sub> Ru <sub>2</sub> | C <sub>26</sub> H <sub>33</sub> Cl <sub>2</sub> N <sub>4</sub> O <sub>2</sub> Rh | C <sub>27</sub> H <sub>34</sub> Cl <sub>5</sub> N <sub>4</sub> O <sub>2</sub> Rh | C <sub>24</sub> H <sub>29</sub> Cl <sub>2</sub> N <sub>4</sub> O <sub>2</sub> Rh |
| Formula weight                                | 454.67                                                             | 1328.42                                                                                       | 607.37                                                                           | 726.74                                                                           | 579.32                                                                           |
| Crystal system                                | Monoclinic                                                         | Monoclinic                                                                                    | Monoclinic                                                                       | Monoclinic                                                                       | Monoclinic                                                                       |
| Space group                                   | I2/a                                                               | P2 <sub>1</sub> /c                                                                            | P2 <sub>1</sub> /c                                                               | P2 <sub>1</sub> /c                                                               | P2 <sub>1</sub> /c                                                               |
| a/Å                                           | 13.8722(4)                                                         | 13.3442(5)                                                                                    | 9.5291(4)                                                                        | 9.4877(3)                                                                        | 9.4637(7)                                                                        |
| b/Å                                           | 13.3255(3)                                                         | 20.1961(7)                                                                                    | 21.4169(12)                                                                      | 21.5981(8)                                                                       | 17.8884(17)                                                                      |
| c/Å                                           | 14.5932(4)                                                         | 20.7032(7)                                                                                    | 14.7086(7)                                                                       | 14.6634(5)                                                                       | 15.0763(16)                                                                      |
| α/°                                           | 90                                                                 | 90                                                                                            | 90                                                                               | 90                                                                               | 90                                                                               |
| β/°                                           | 107.474(3)                                                         | 95.414(2)                                                                                     | 102.977(4)                                                                       | 101.454(3)                                                                       | 99.401(9)                                                                        |
| γ/°                                           | 90                                                                 | 90                                                                                            | 90                                                                               | 90                                                                               | 90                                                                               |
| Volume/Å <sup>3</sup>                         | 2573.12(12)                                                        | 5554.6(3)                                                                                     | 2025.1(3)                                                                        | 2944.93(18)                                                                      | 2518.0(4)                                                                        |
| Z                                             | 8                                                                  | 4                                                                                             | 4                                                                                | 4                                                                                | 4                                                                                |
| ρ <sub>calc</sub> mg/mm <sup>3</sup>          | 2.347                                                              | 1.589                                                                                         | 1.379                                                                            | 1.639                                                                            | 1.528                                                                            |
| μ/mm <sup>-1</sup>                            | 11.642                                                             | 0.933                                                                                         | 0.794                                                                            | 1.067                                                                            | 0.919                                                                            |
| F(000)                                        | 1712.0                                                             | 2712                                                                                          | 1248.0                                                                           | 1480.0                                                                           | 1184.0                                                                           |
| Crystal size/mm <sup>3</sup>                  | 0.03 × 0.04 × 0.16                                                 | 0.012 × 0.031 × 0.081                                                                         | 0.02 × 0.04 × 0.05                                                               | 0.02 × 0.05 × 0.07                                                               | 0.02 × 0.04 × 0.12                                                               |
| 2θ range                                      | 6.114 to 58.754°                                                   | 1.412 to 30.780°                                                                              | 4.748 to 58.656°                                                                 | 4.718 to 58.962°                                                                 | 4.922 to 58.876°                                                                 |
| Reflections collected                         | 6494                                                               | 175605                                                                                        | 15933                                                                            | 17628                                                                            | 14472                                                                            |
| Independent reflections                       | 2964                                                               | 17268                                                                                         | 6884                                                                             | 6803                                                                             | 5791                                                                             |
| Data/restraints/parameters                    | 2964/0/167                                                         | 17268/0/691                                                                                   | 6884/0/324                                                                       | 6803/0/360                                                                       | 5791/0/301                                                                       |
| Goodness-of-fit on F <sup>2</sup>             | 1.086                                                              | 1.017                                                                                         | 1.020                                                                            | 1.020                                                                            | 1.141                                                                            |
| Final R indices [I>2σ(I)]                     | R <sub>1</sub> = 0.0216<br>wR <sub>2</sub> = 0.0494                | R <sub>1</sub> = 0.0515<br>wR <sub>2</sub> = 0.1287                                           | R <sub>1</sub> = 0.0385<br>wR <sub>2</sub> = 0.0779                              | R <sub>1</sub> = 0.0305<br>wR <sub>2</sub> = 0.0617                              | R <sub>1</sub> = 0.0653<br>wR <sub>2</sub> = 0.1215                              |
| Largest difference peak/hole/eÅ <sup>-3</sup> | 0.89/-1.16                                                         | 2.6/-1.8                                                                                      | 0.58/-0.51                                                                       | 0.45/-0.43                                                                       | 1.25/-0.78                                                                       |

## NMR spectra

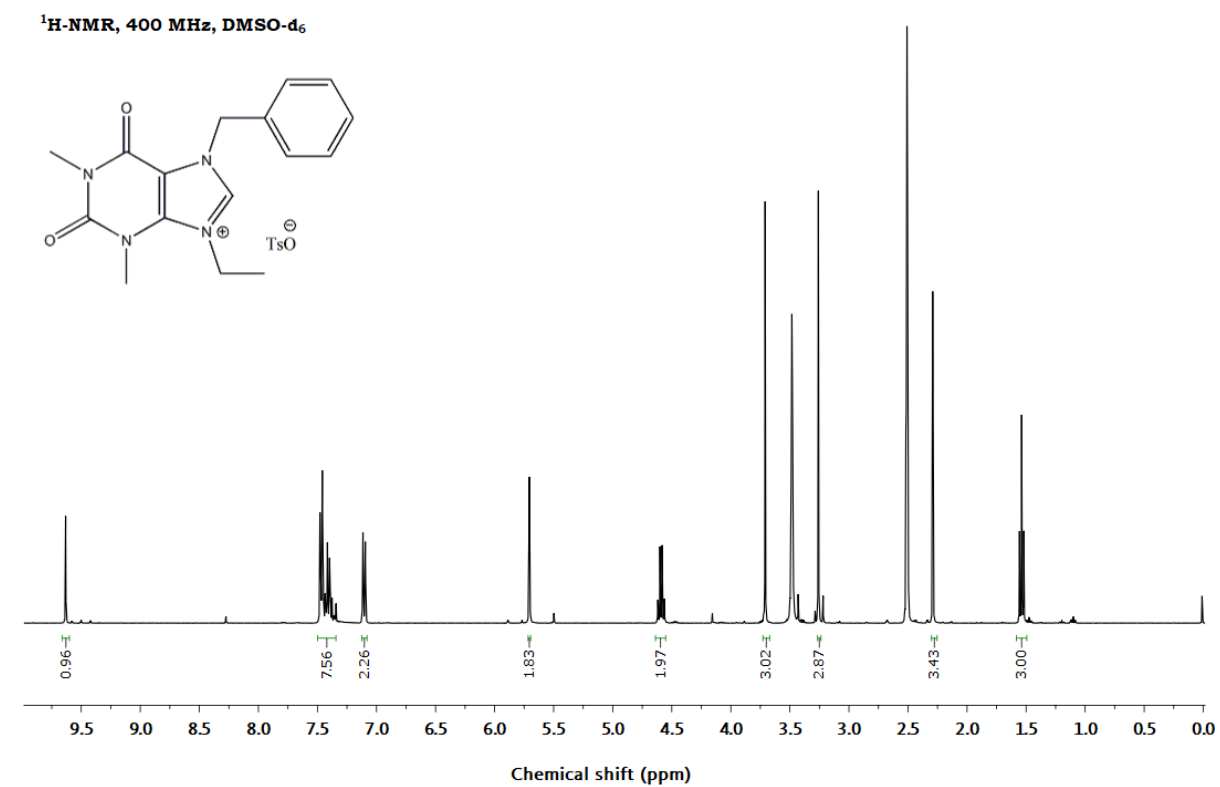

Figure S1

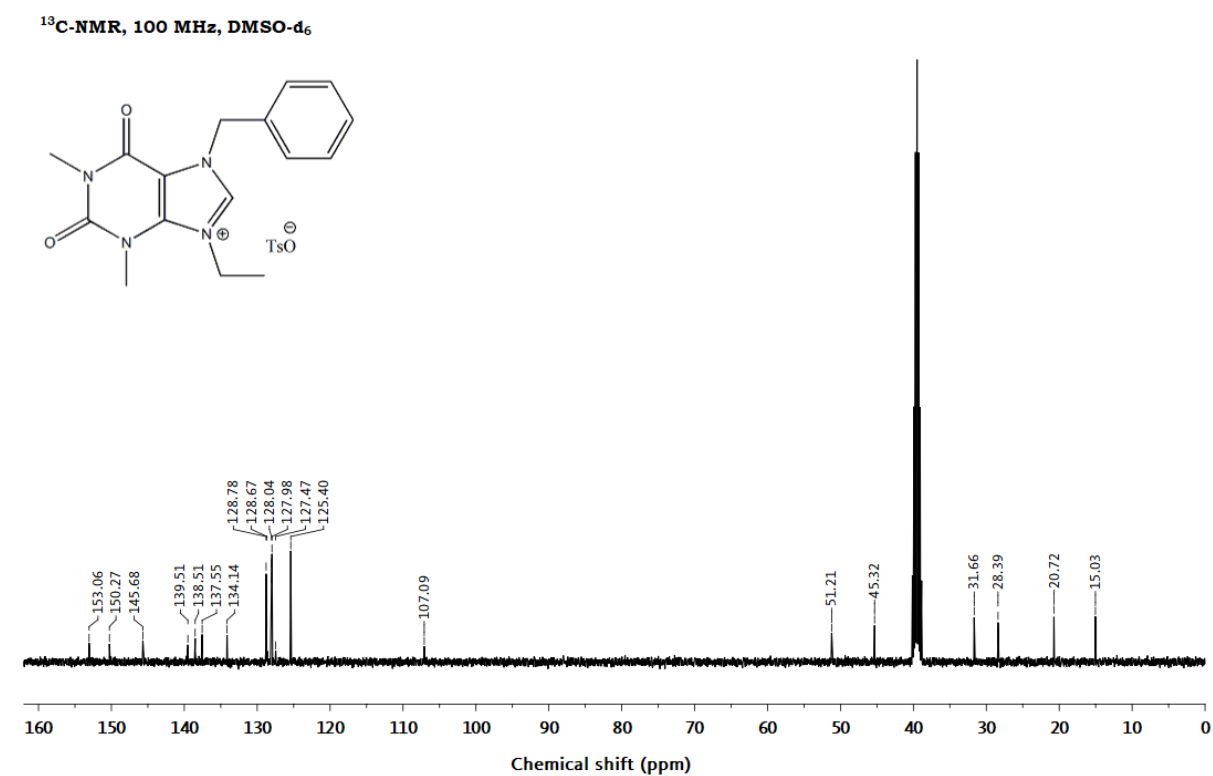

Figure S2

<sup>1</sup>H-NMR, 400 MHz, DMSO-d<sub>6</sub>

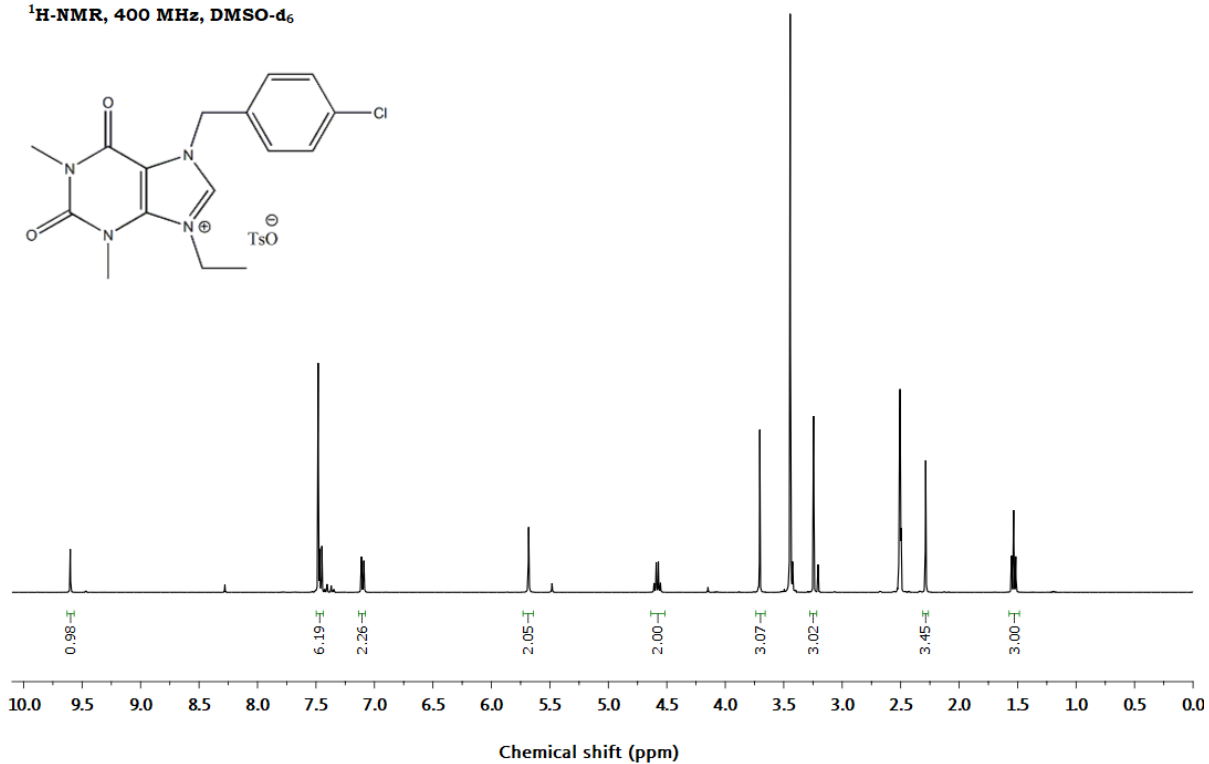

Figure S3

<sup>13</sup>C-NMR, 100 MHz, DMSO-d<sub>6</sub>

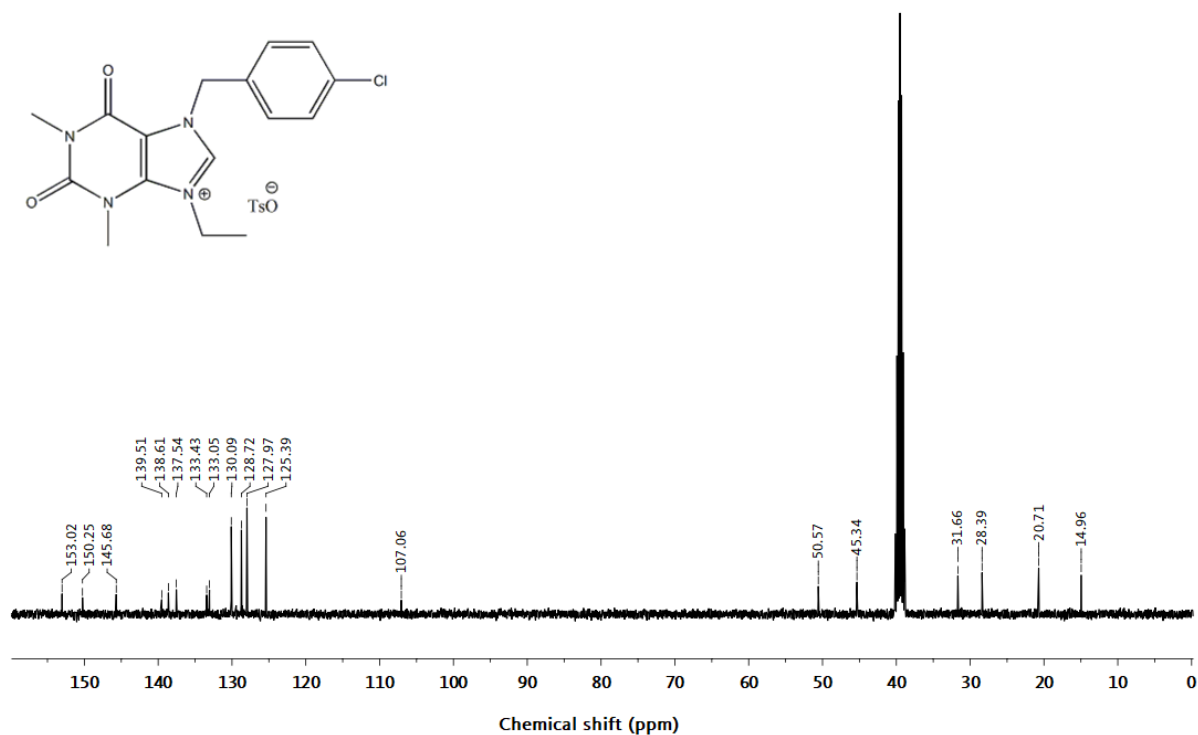

Figure S4

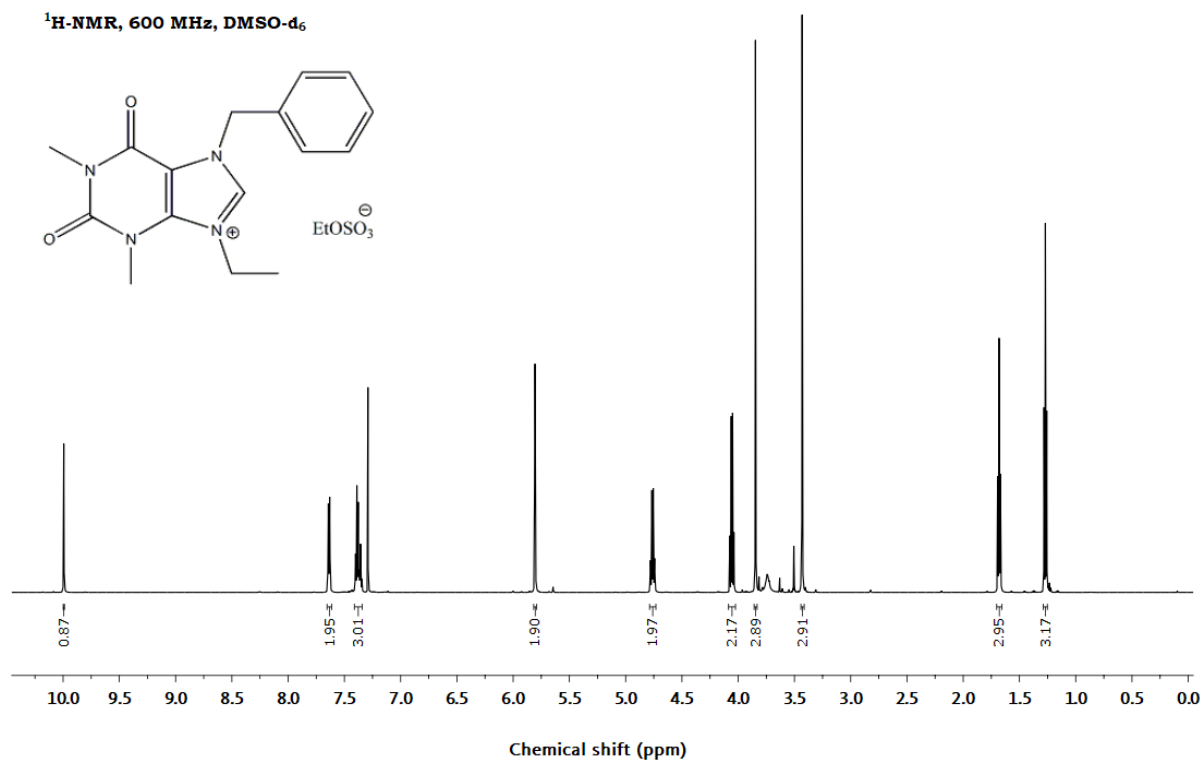

Figure S5

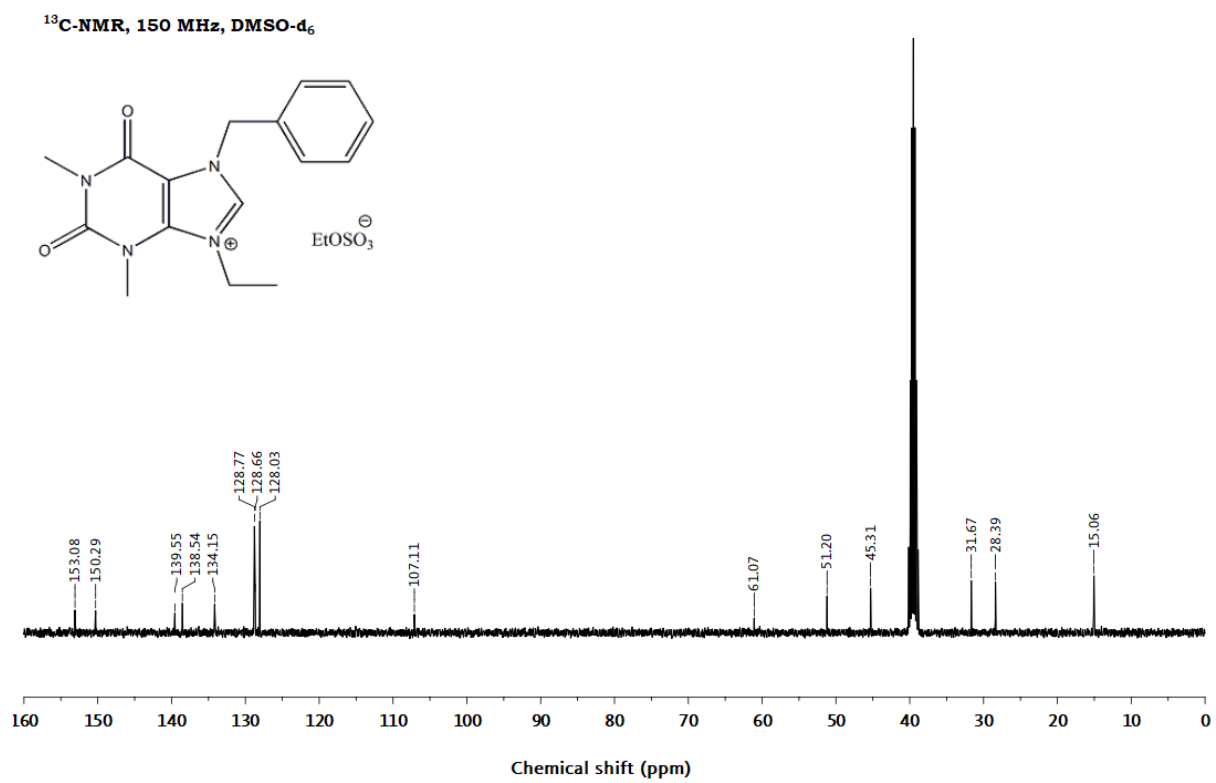

Figure S6

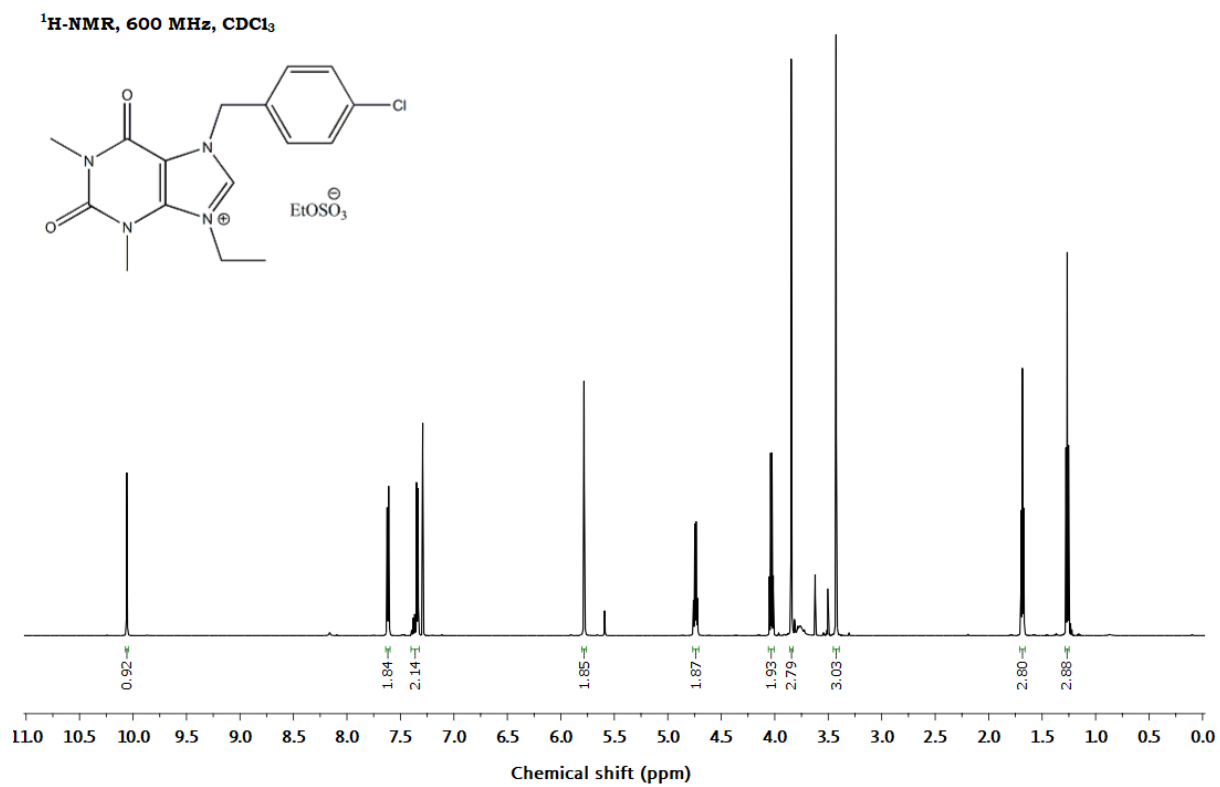

Figure S7

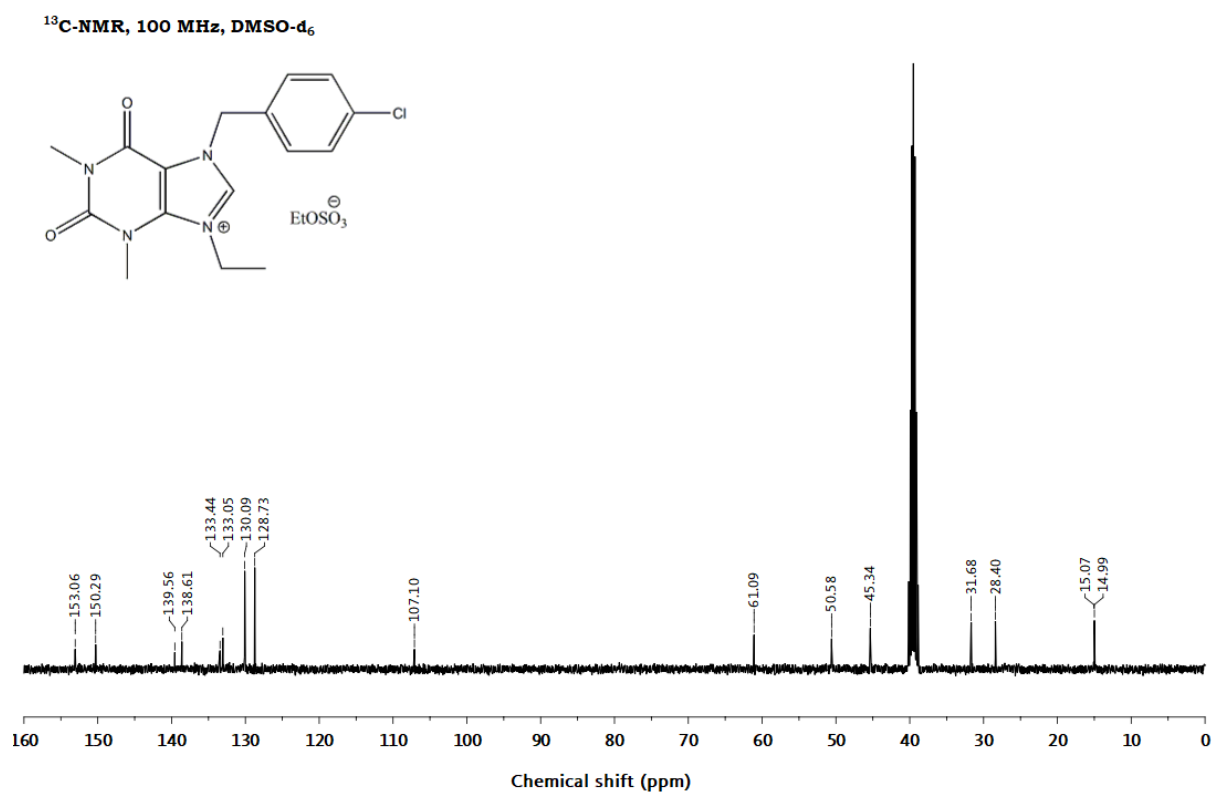

Figure S8

<sup>1</sup>H-NMR, 600 MHz, DMSO-d<sub>6</sub>

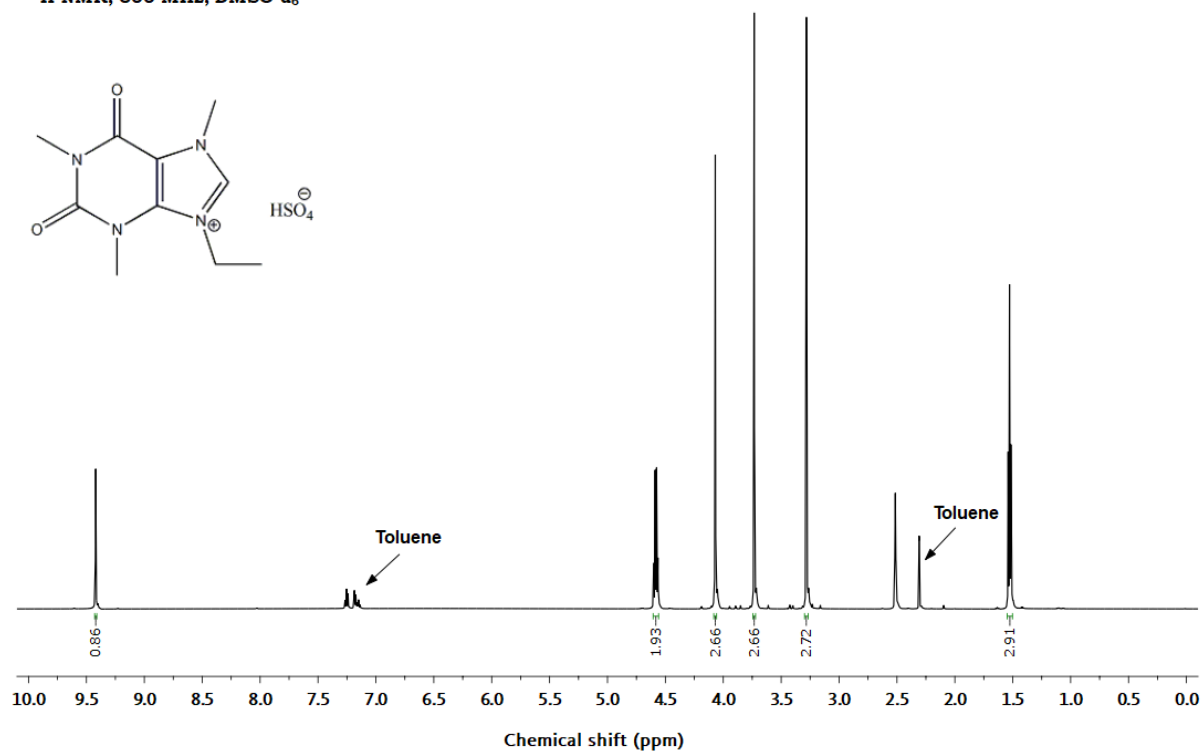

Figure S9

<sup>13</sup>C-NMR, 100 MHz, DMSO-d<sub>6</sub>

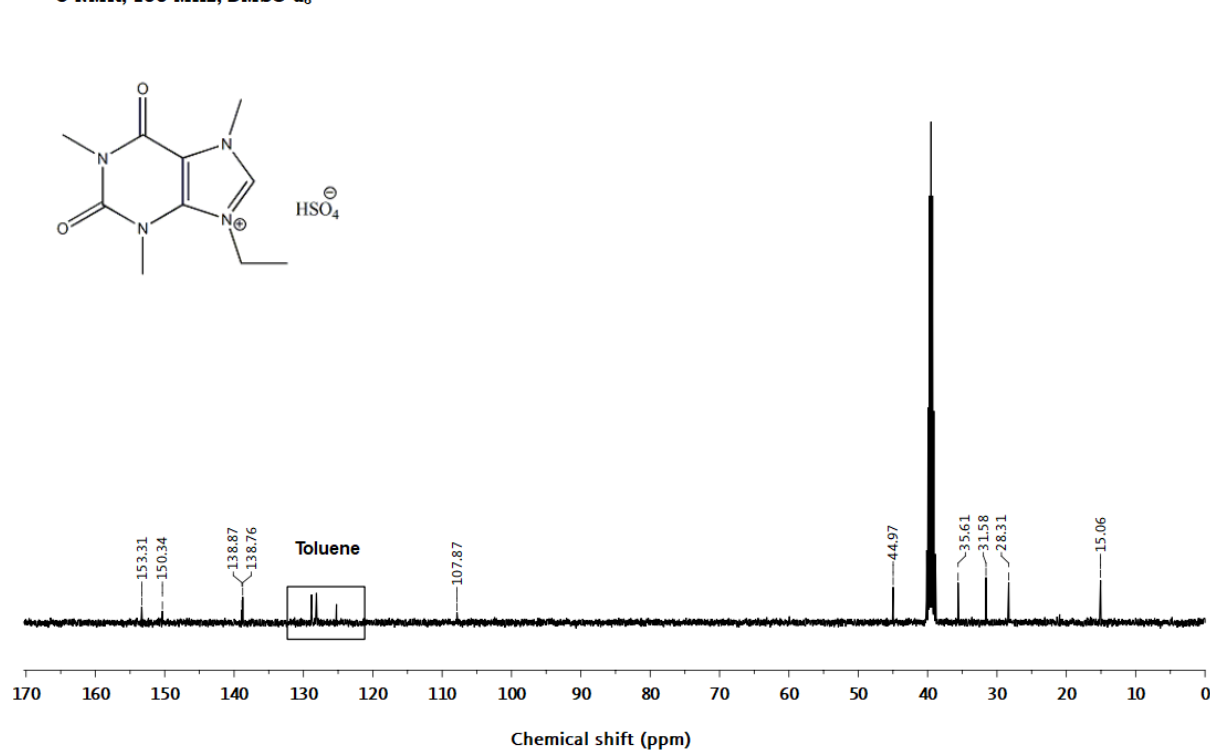

Figure S10



**<sup>1</sup>H-NMR, 400 MHz, DMSO-d<sub>6</sub>**

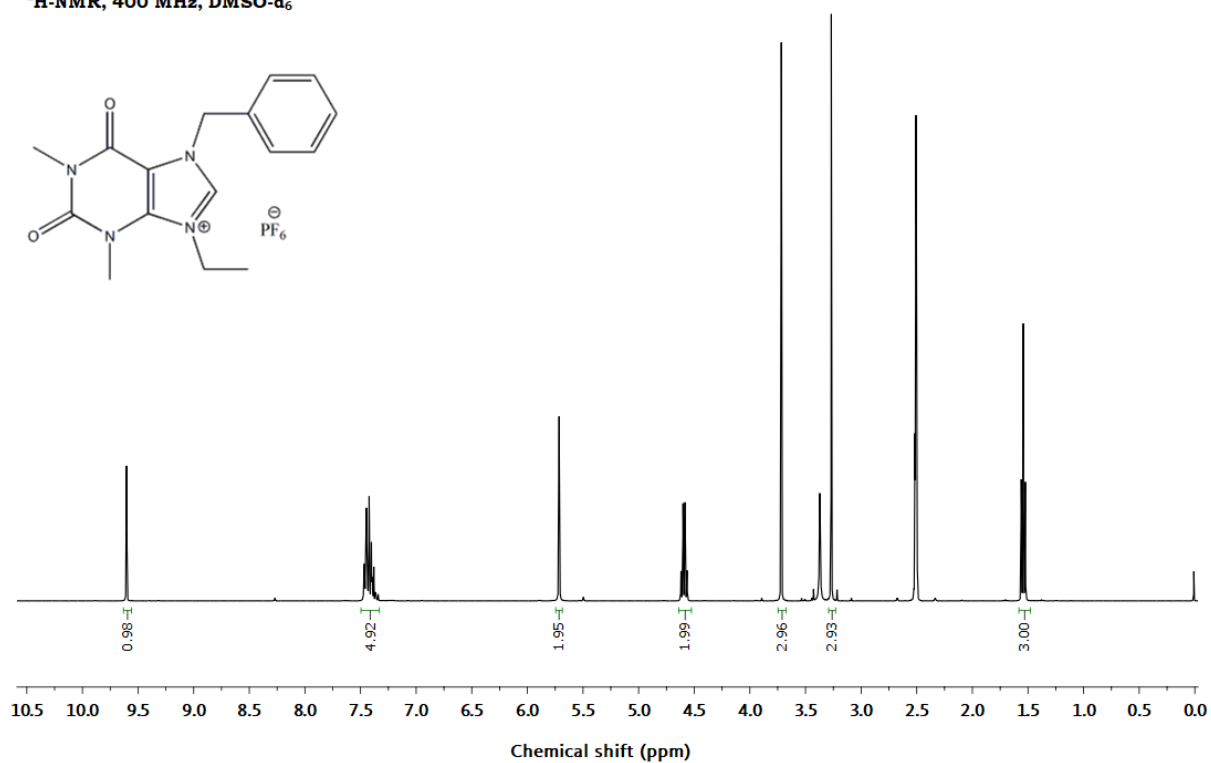

Figure S11

**<sup>13</sup>C-NMR, 100 MHz, DMSO-d<sub>6</sub>**

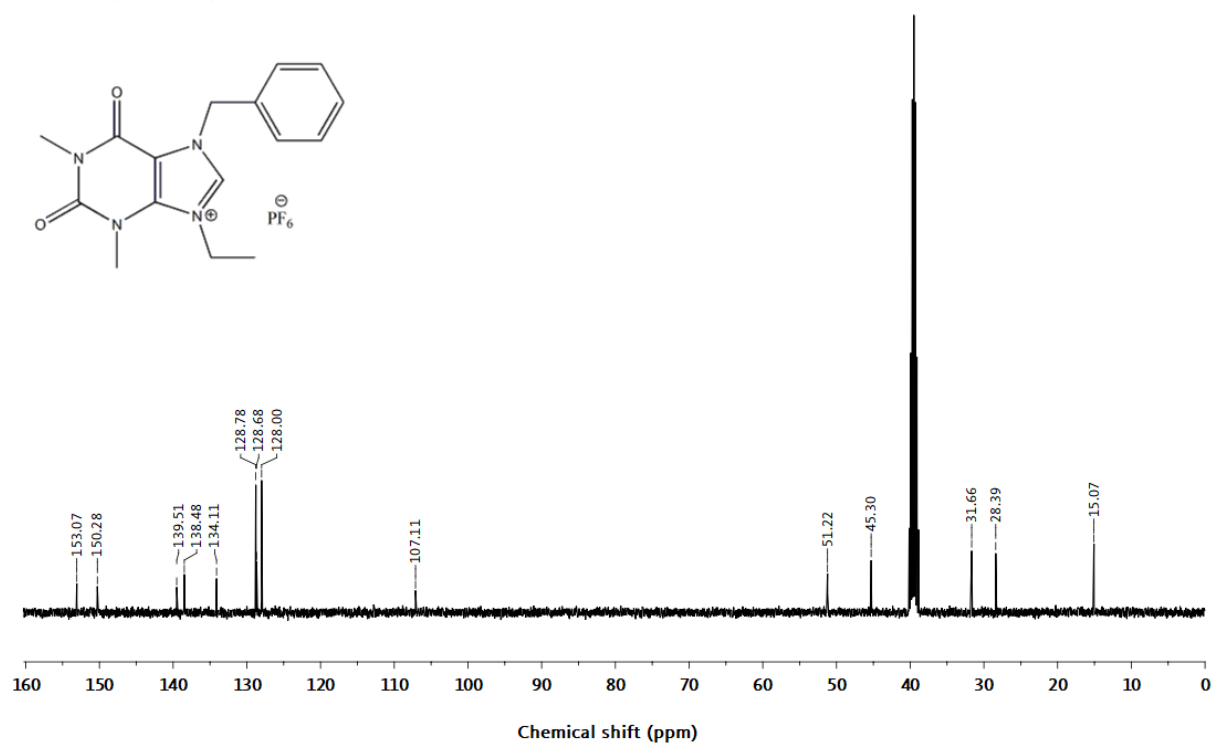

Figure S12

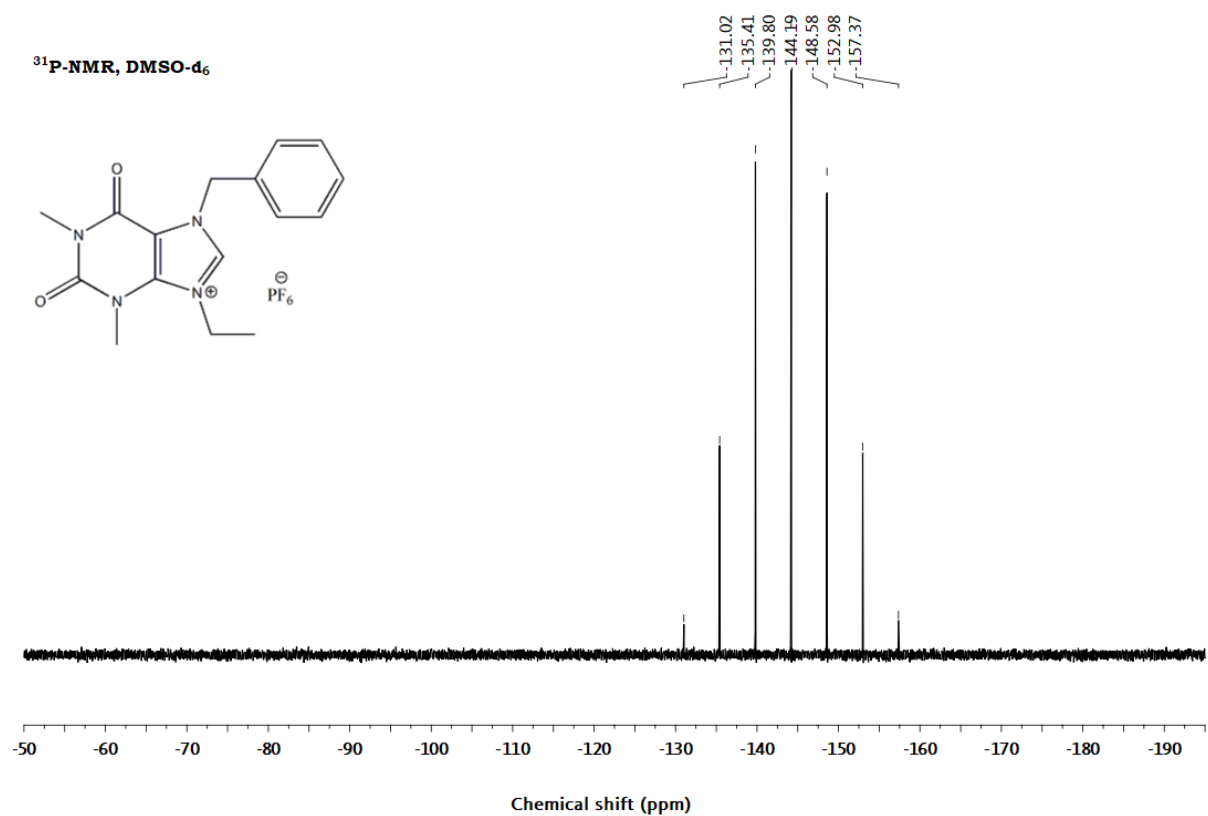

Figure S13

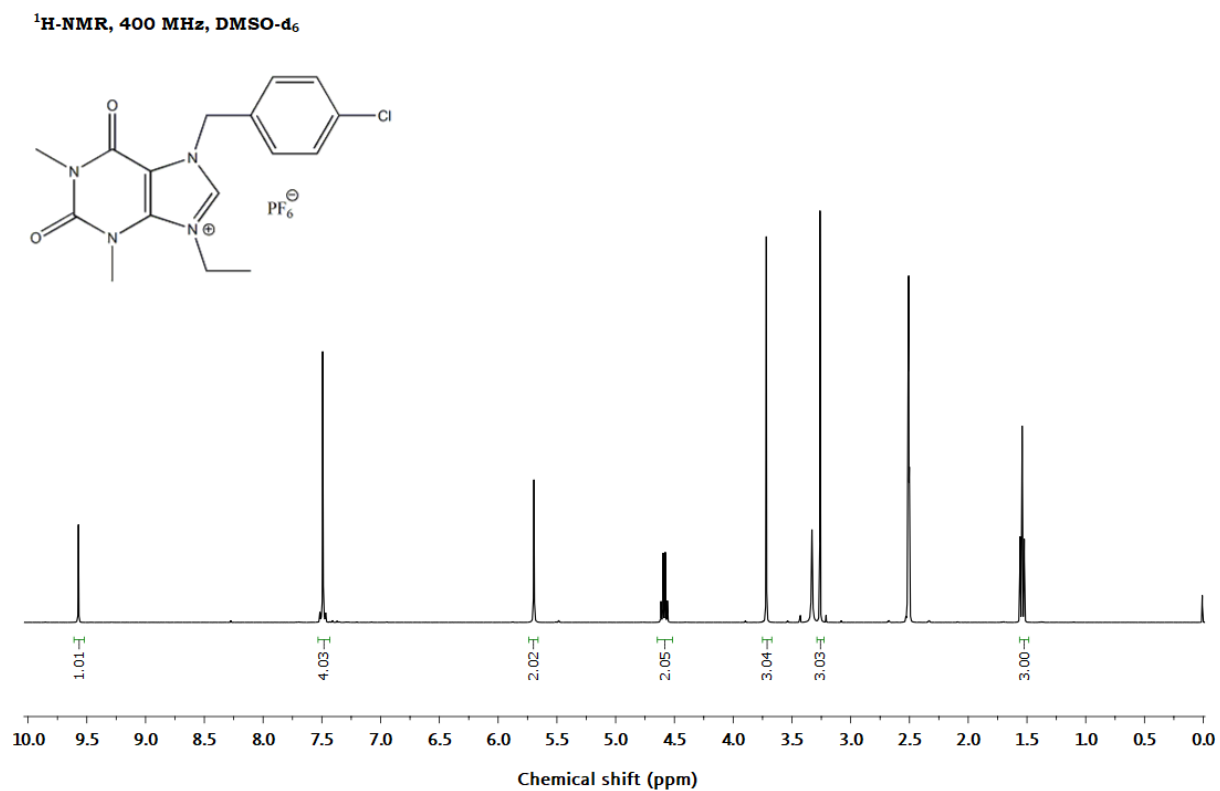

Figure S14

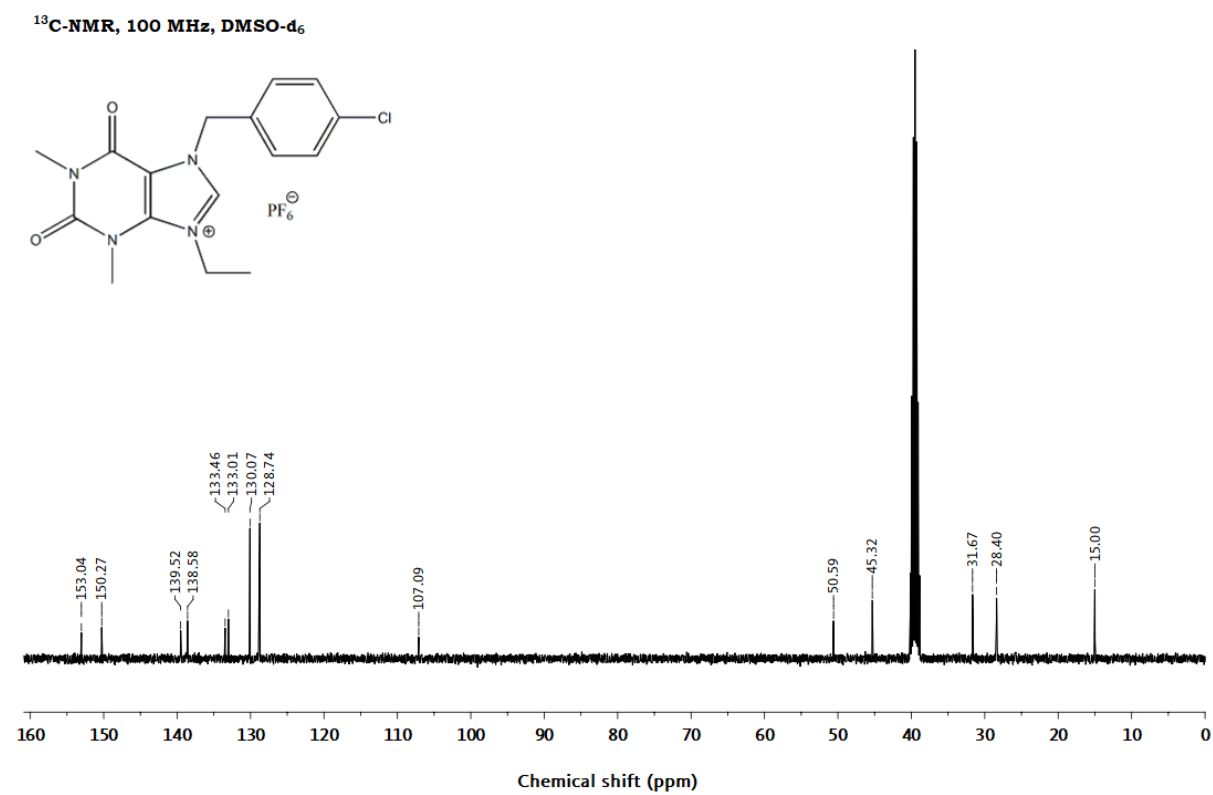

Figure S15

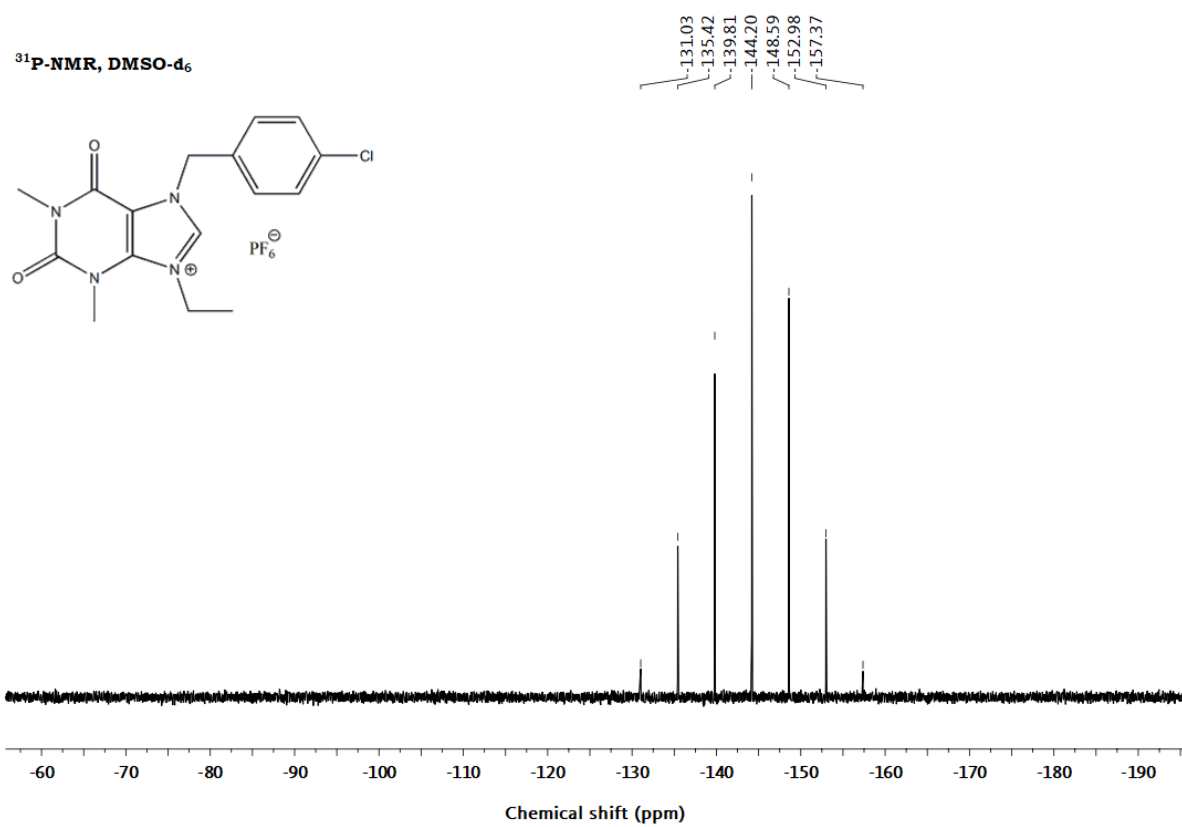

Figure S16

<sup>1</sup>H-NMR, 400 MHz, DMSO-d<sub>6</sub>

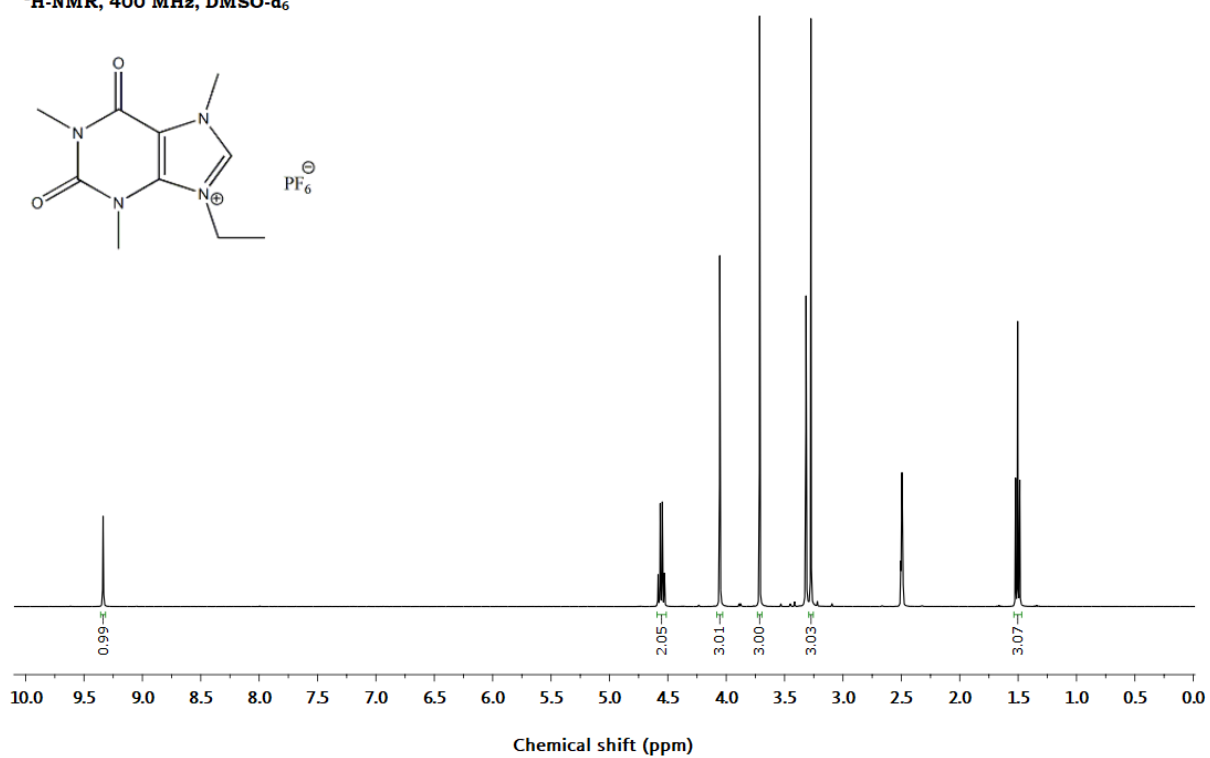

Figure S17

<sup>13</sup>C-NMR, 100 MHz, DMSO-d<sub>6</sub>

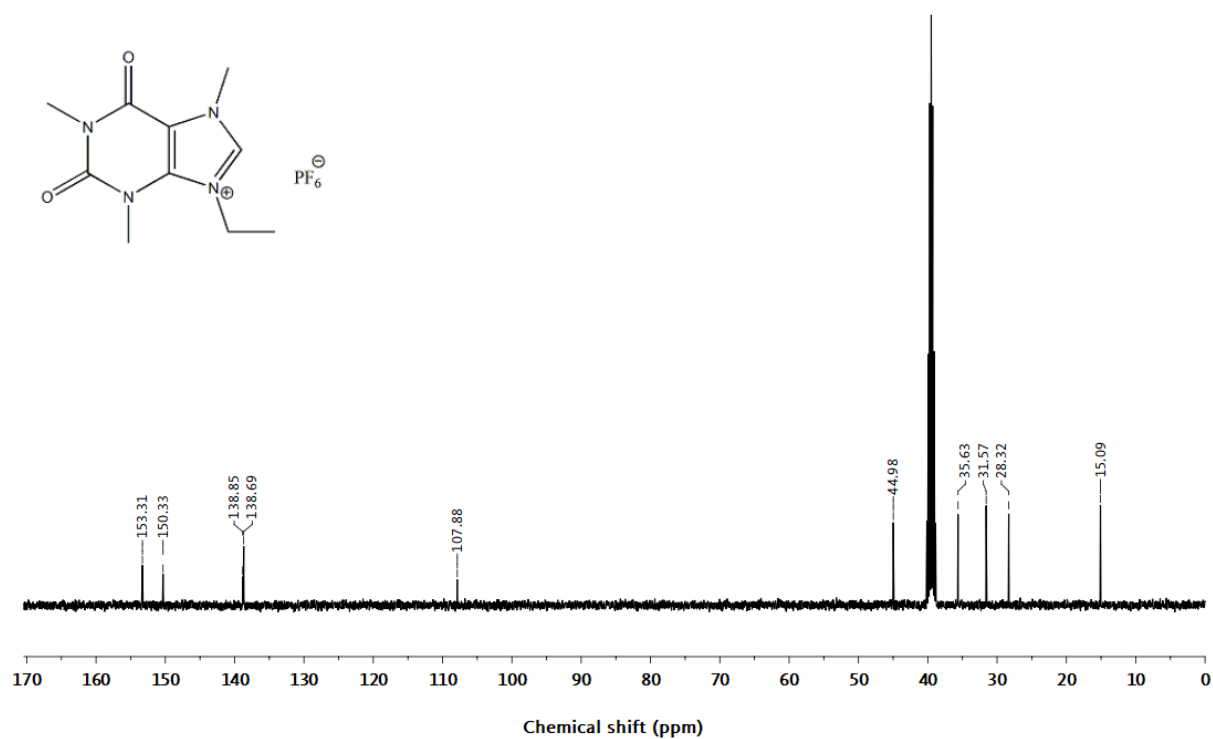

Figure S18

<sup>31</sup>P-NMR, DMSO-d<sub>6</sub>

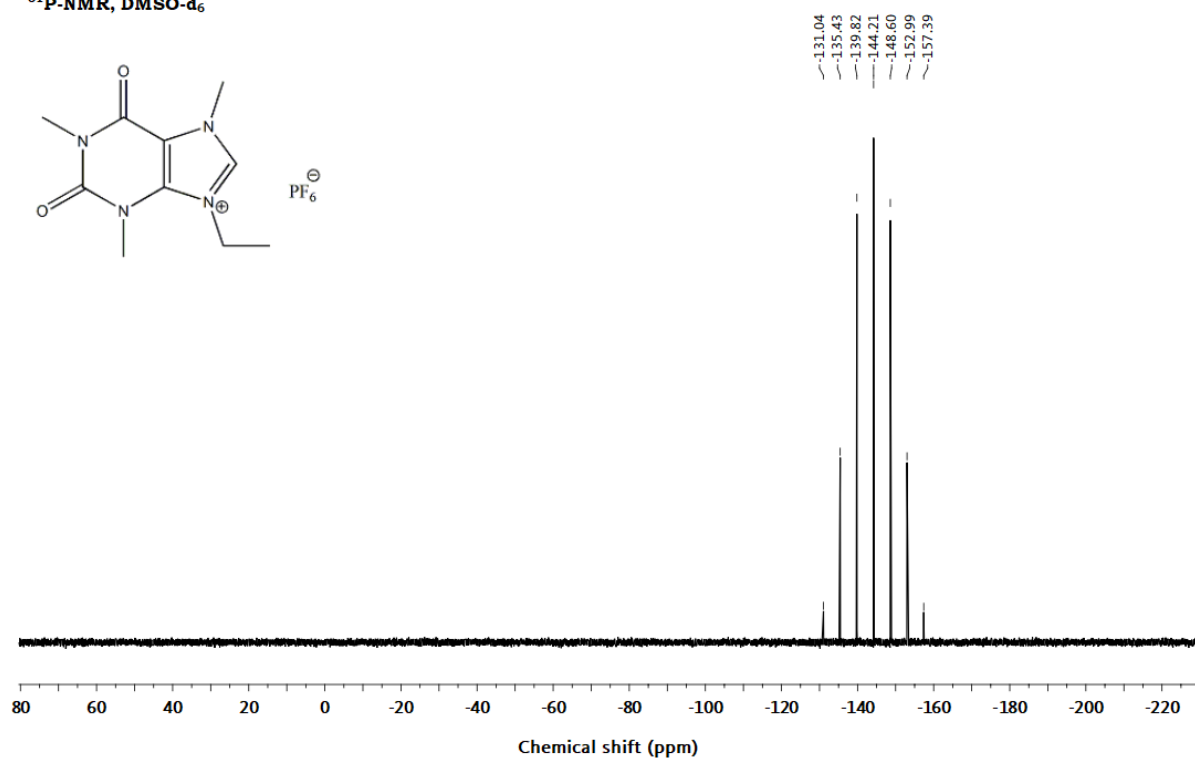

Figure S19

**<sup>1</sup>H-NMR, 400 MHz, DMSO-d<sub>6</sub>**

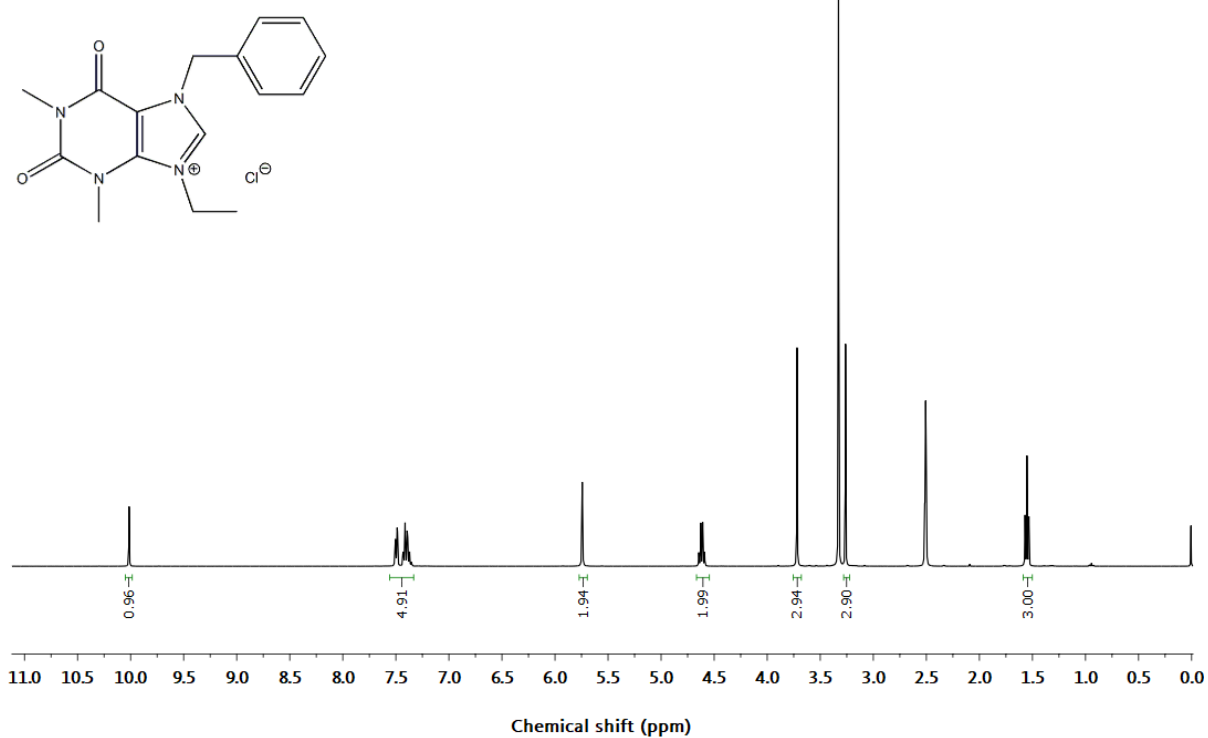

Figure S20

**<sup>13</sup>C-NMR, 100 MHz, DMSO-d<sub>6</sub>**

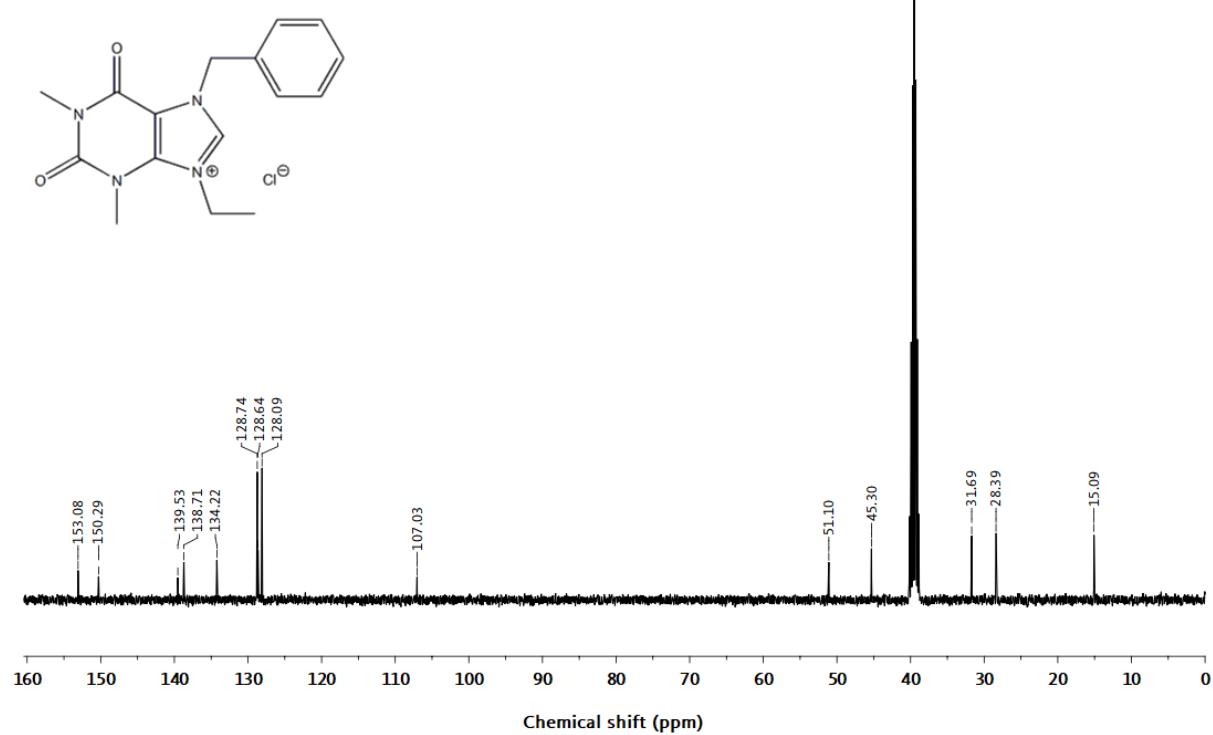

Figure S21

<sup>35</sup>Cl-NMR, 54 MHz, DMSO-d<sub>6</sub>

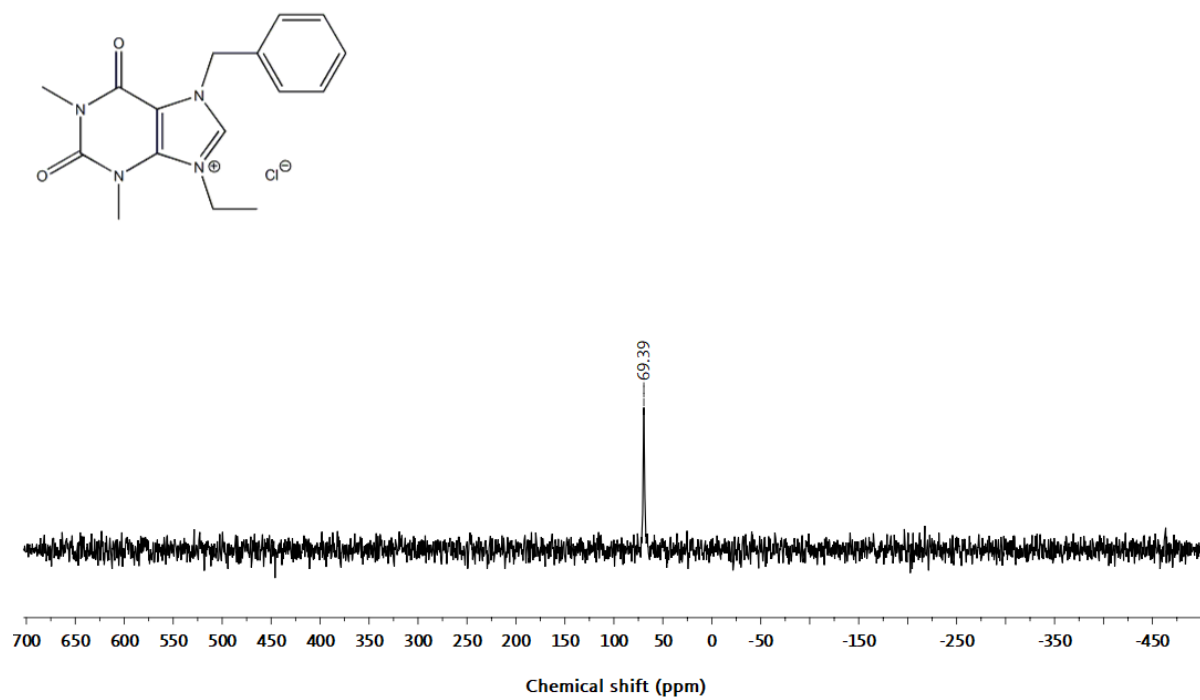

Figure S22



<sup>1</sup>H-NMR, 400 MHz, DMSO-d<sub>6</sub>

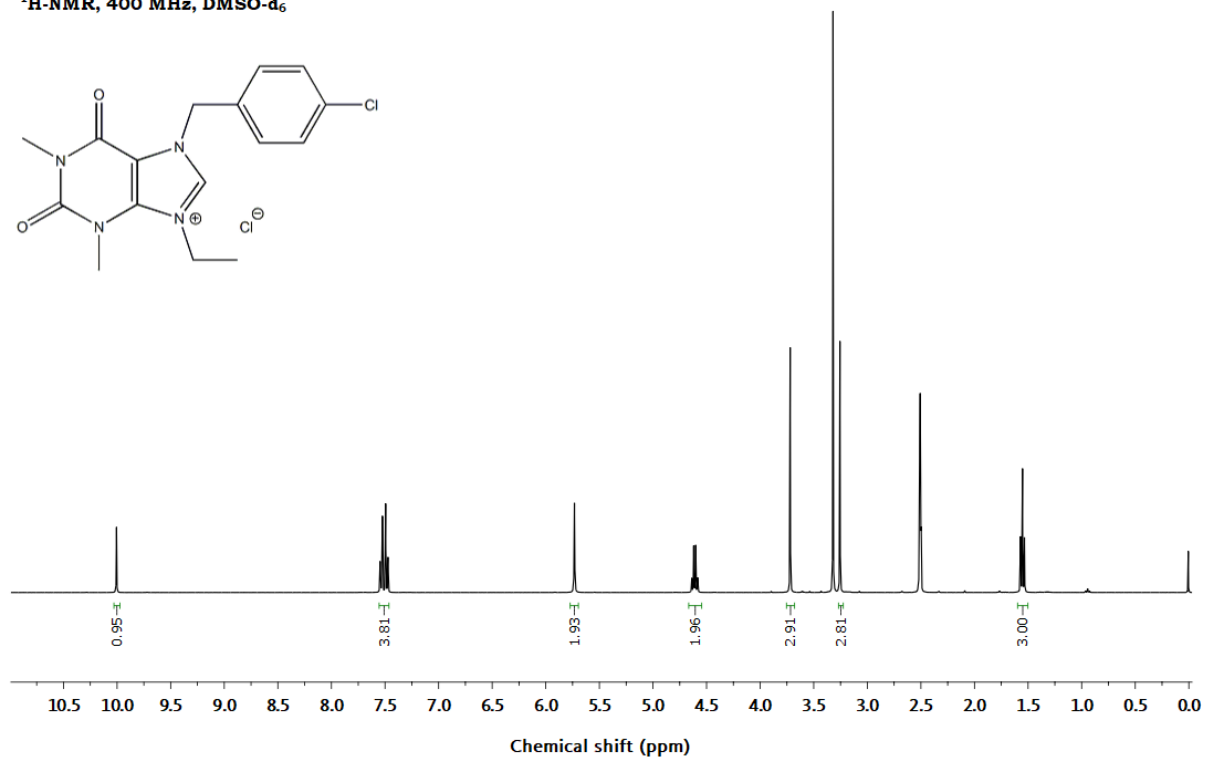

Figure S23

<sup>13</sup>C-NMR, 100 MHz, DMSO-d<sub>6</sub>

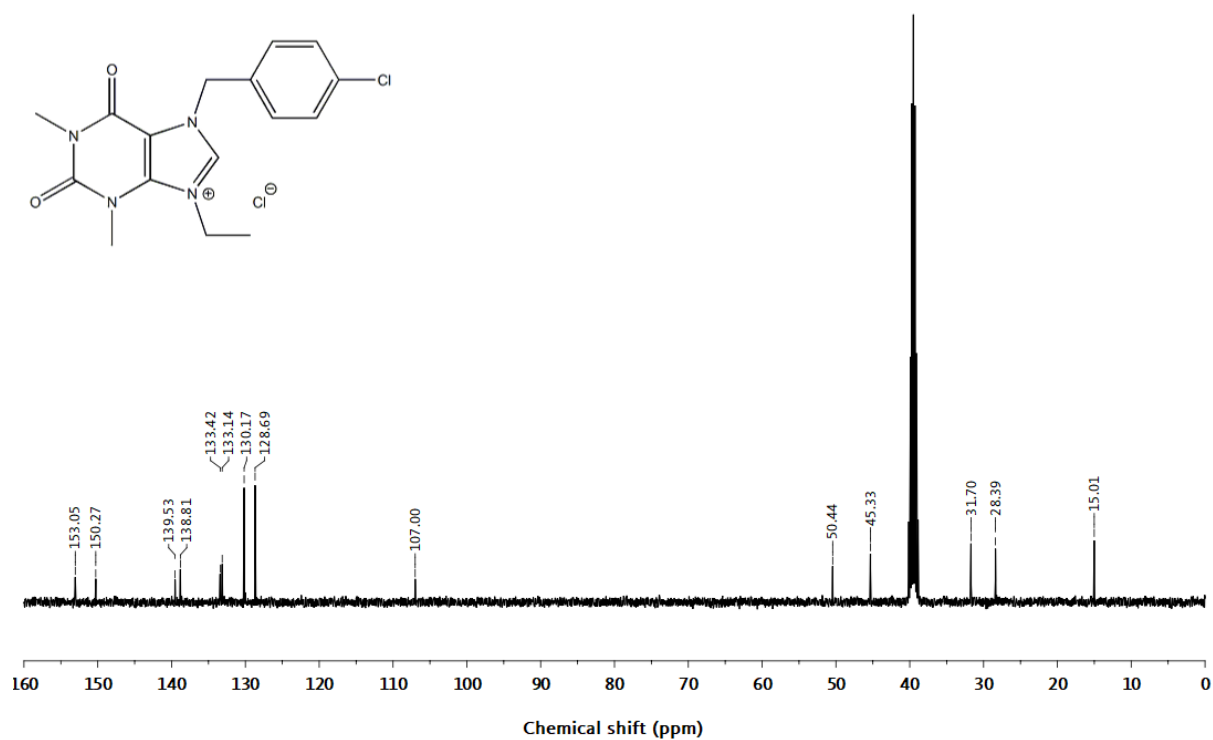

Figure S24

<sup>35</sup>Cl-NMR, 54 MHz, DMSO-d<sub>6</sub>

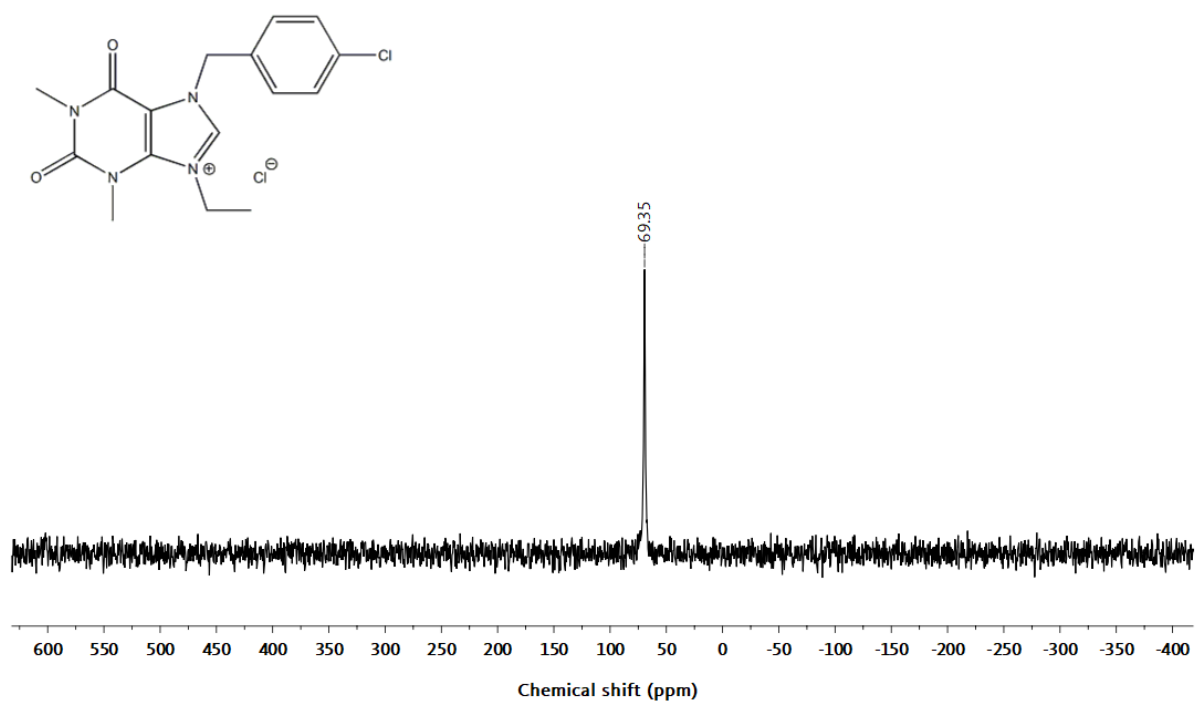

Figure S25

**<sup>1</sup>H-NMR, 400 MHz, DMSO-d<sub>6</sub>**

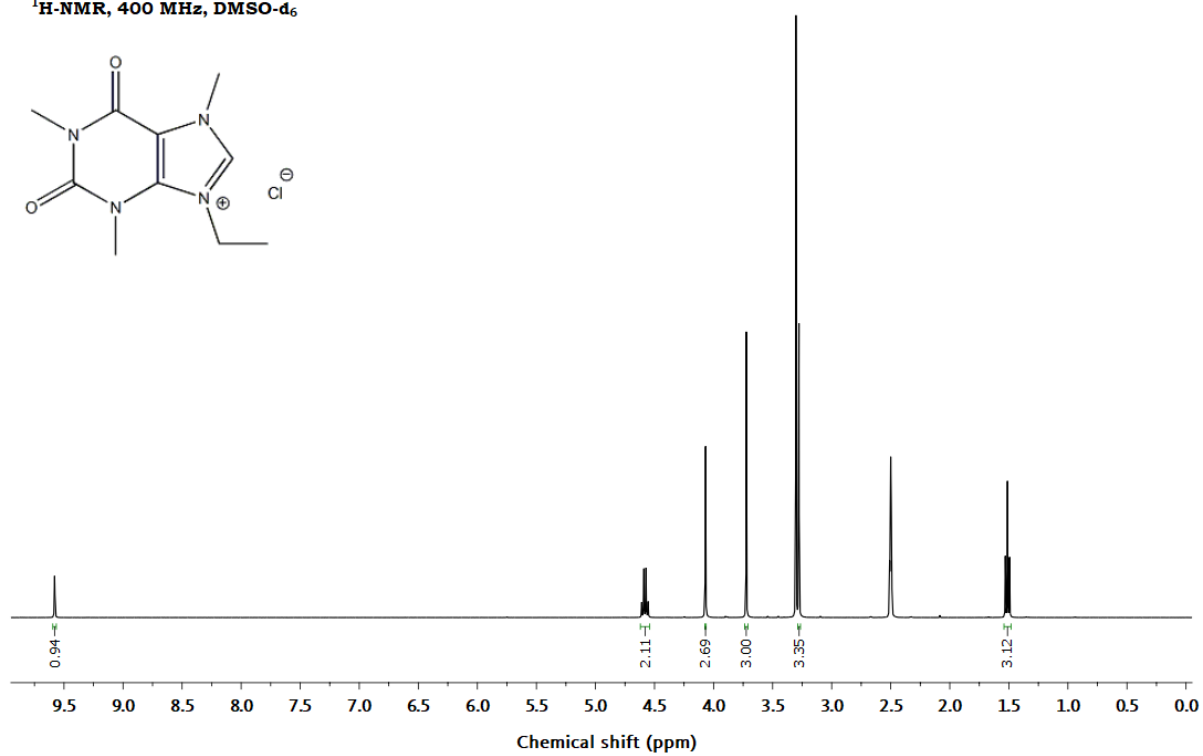

Figure S26

**<sup>13</sup>C-NMR, 150 MHz, DMSO-d<sub>6</sub>**

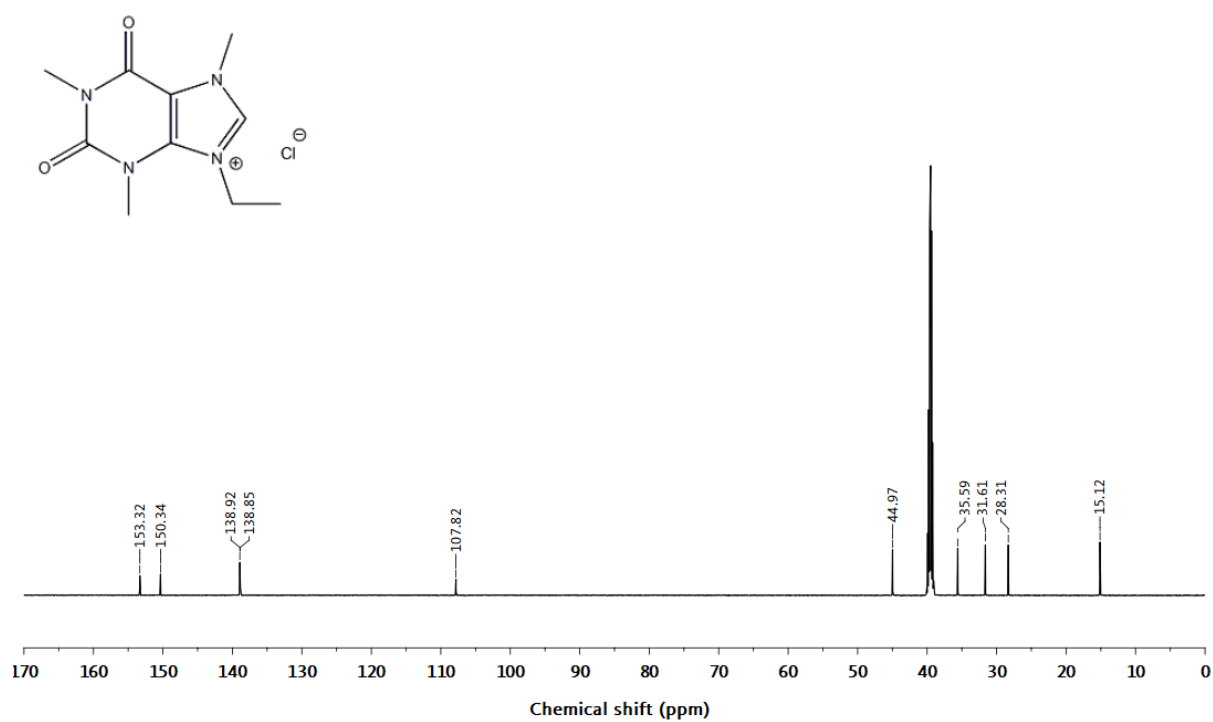

Figure S27

<sup>35</sup>Cl-NMR, 39 MHz, DMSO-d<sub>6</sub>

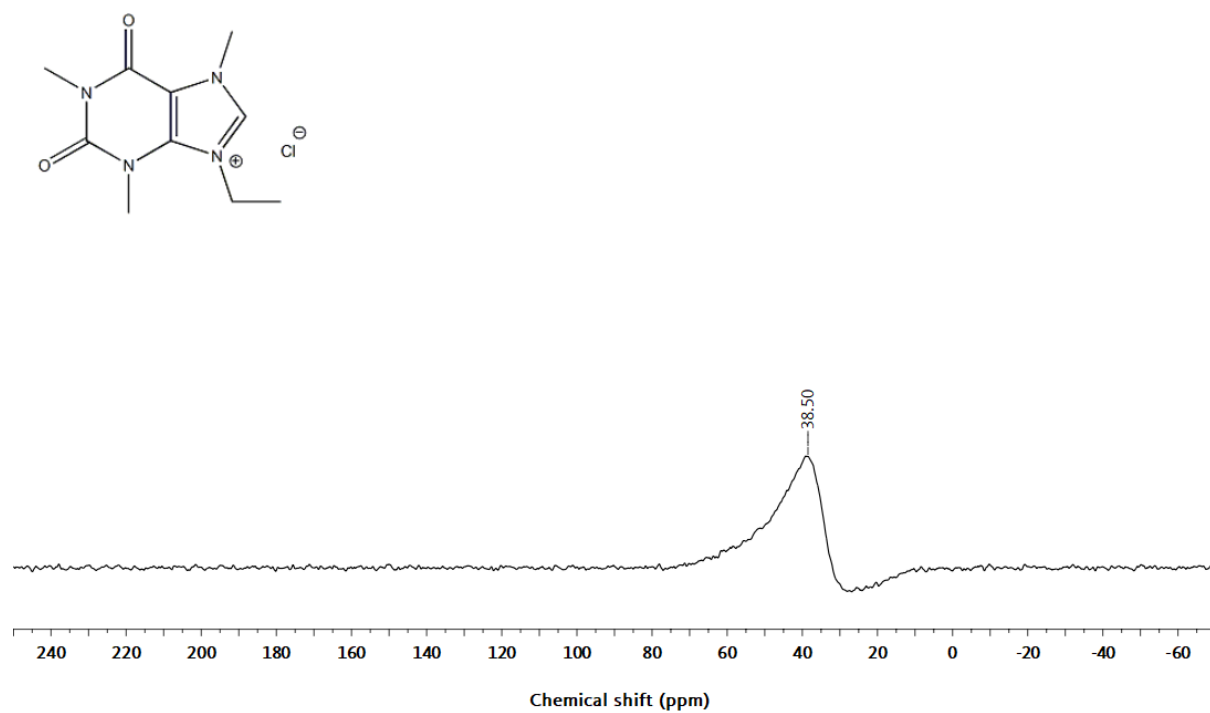

Figure S 28

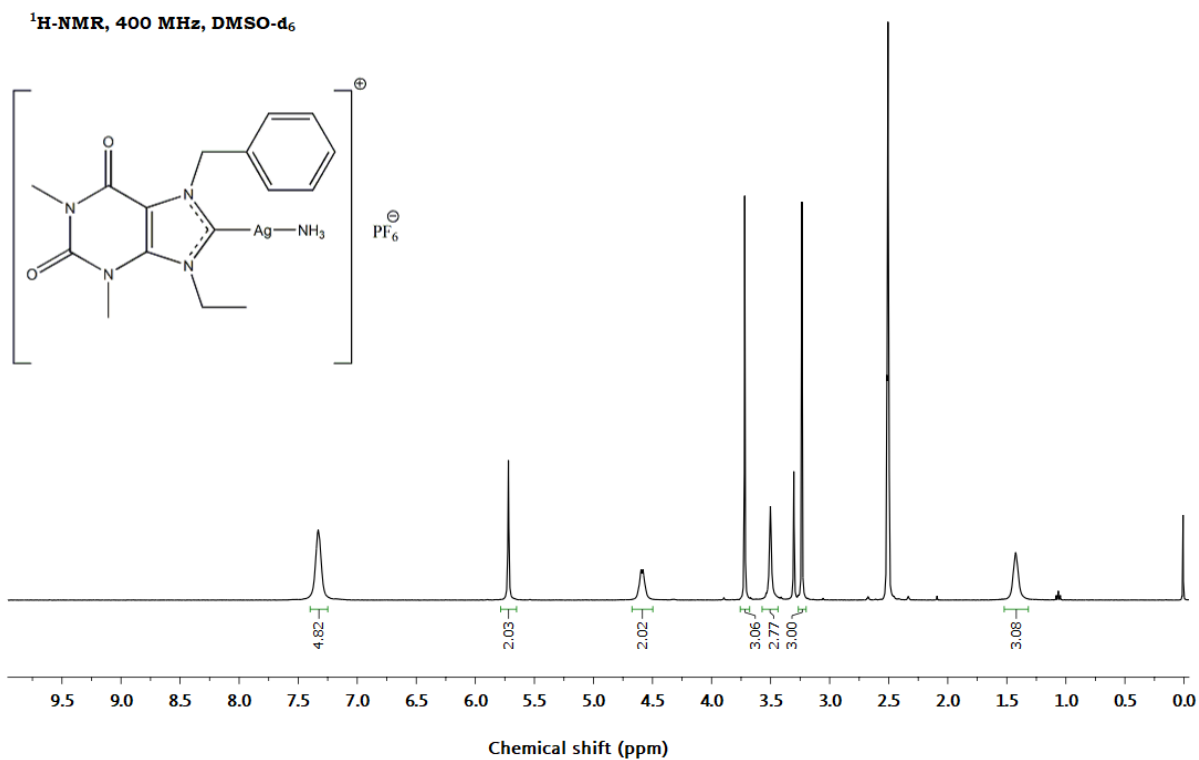

Figure S29

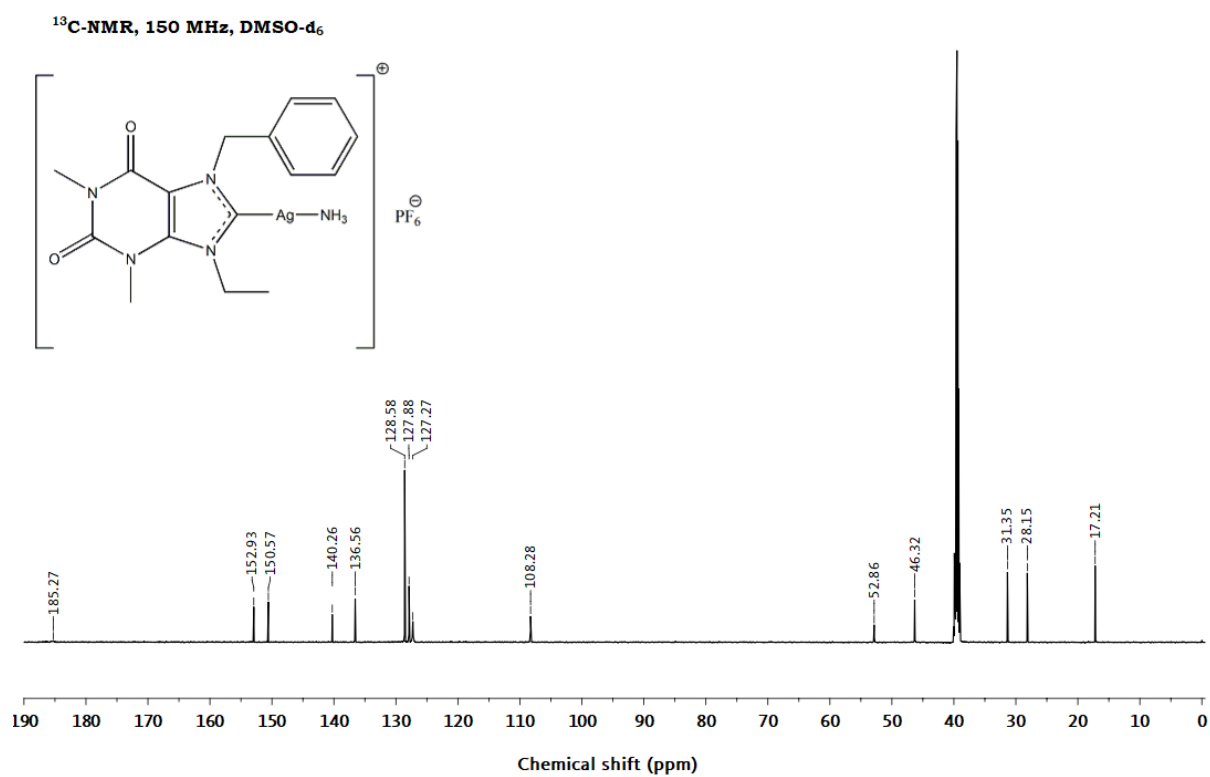

Figure S30

<sup>31</sup>P-NMR, DMSO-d<sub>6</sub>

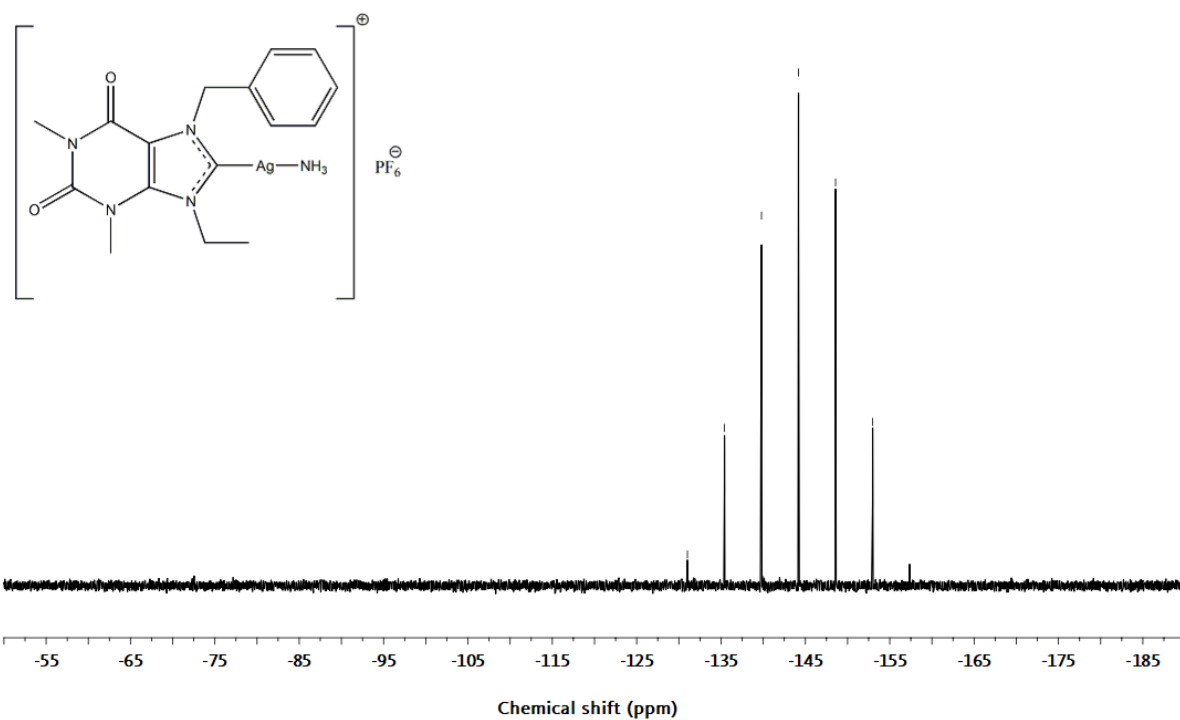

Figure S31

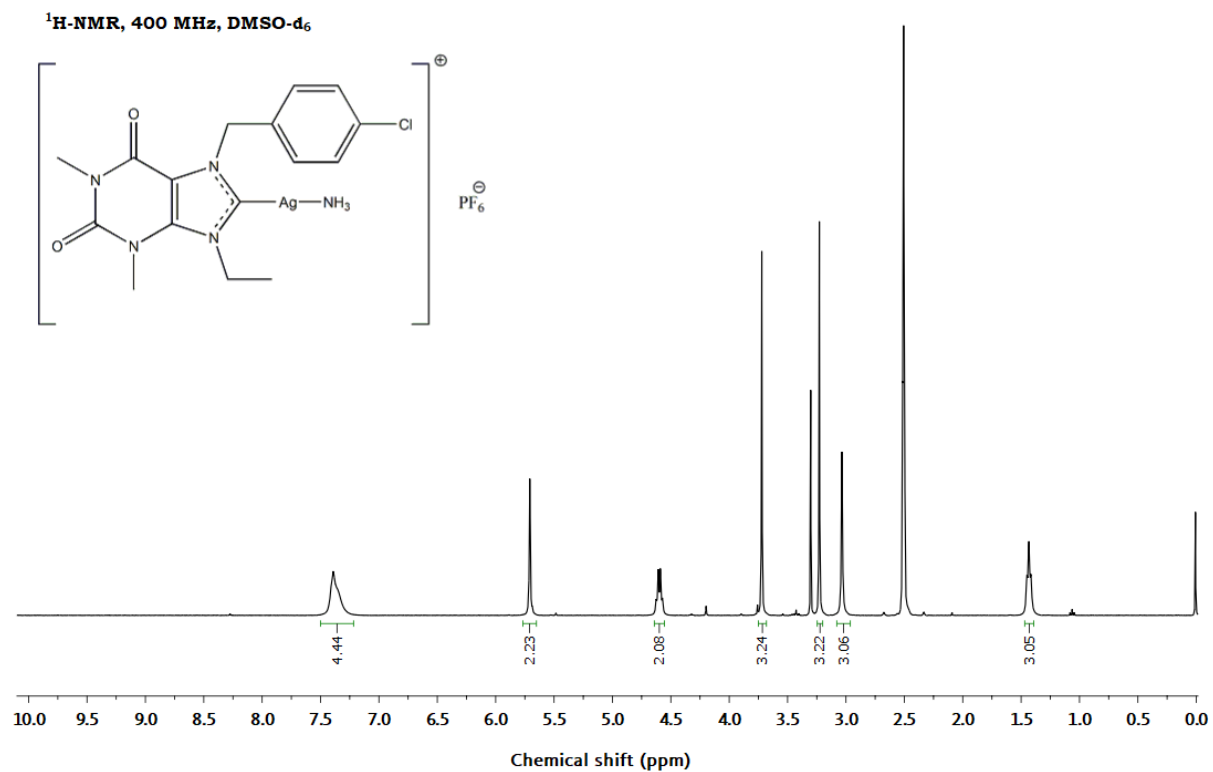

Figure S32

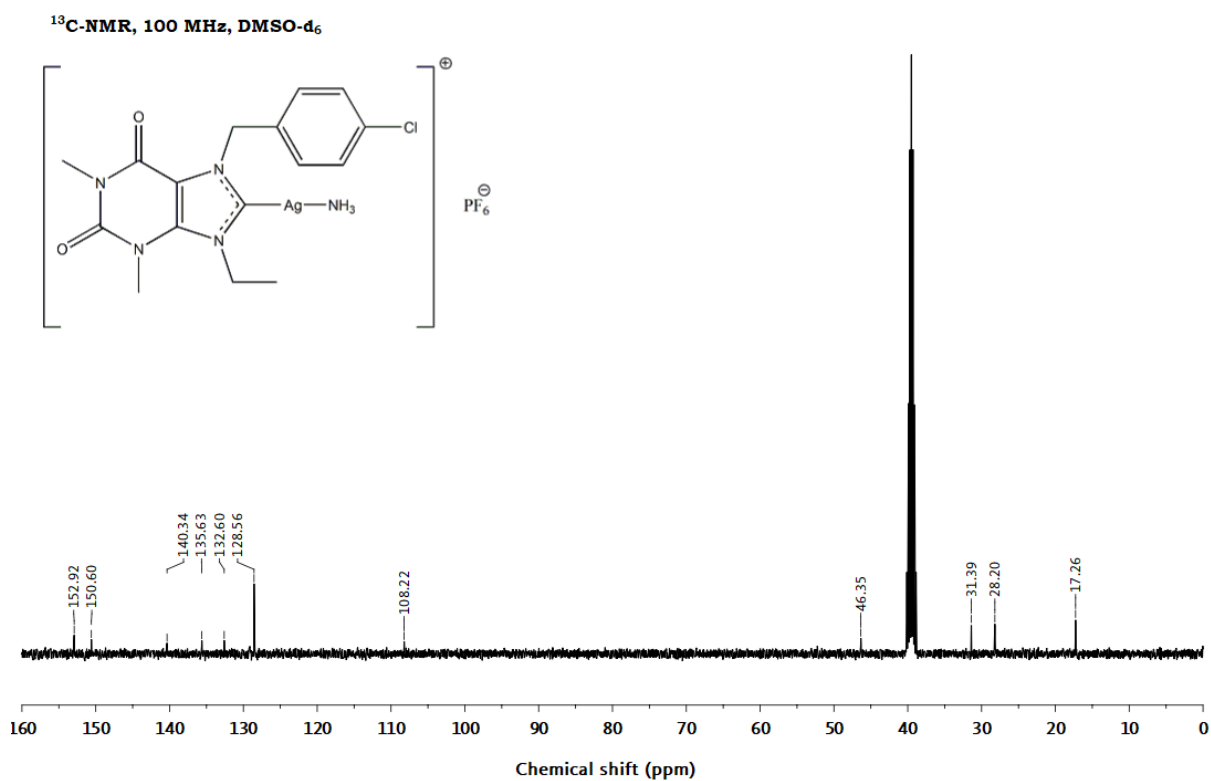

Figure S33

<sup>31</sup>P-NMR, DMSO-d<sub>6</sub>

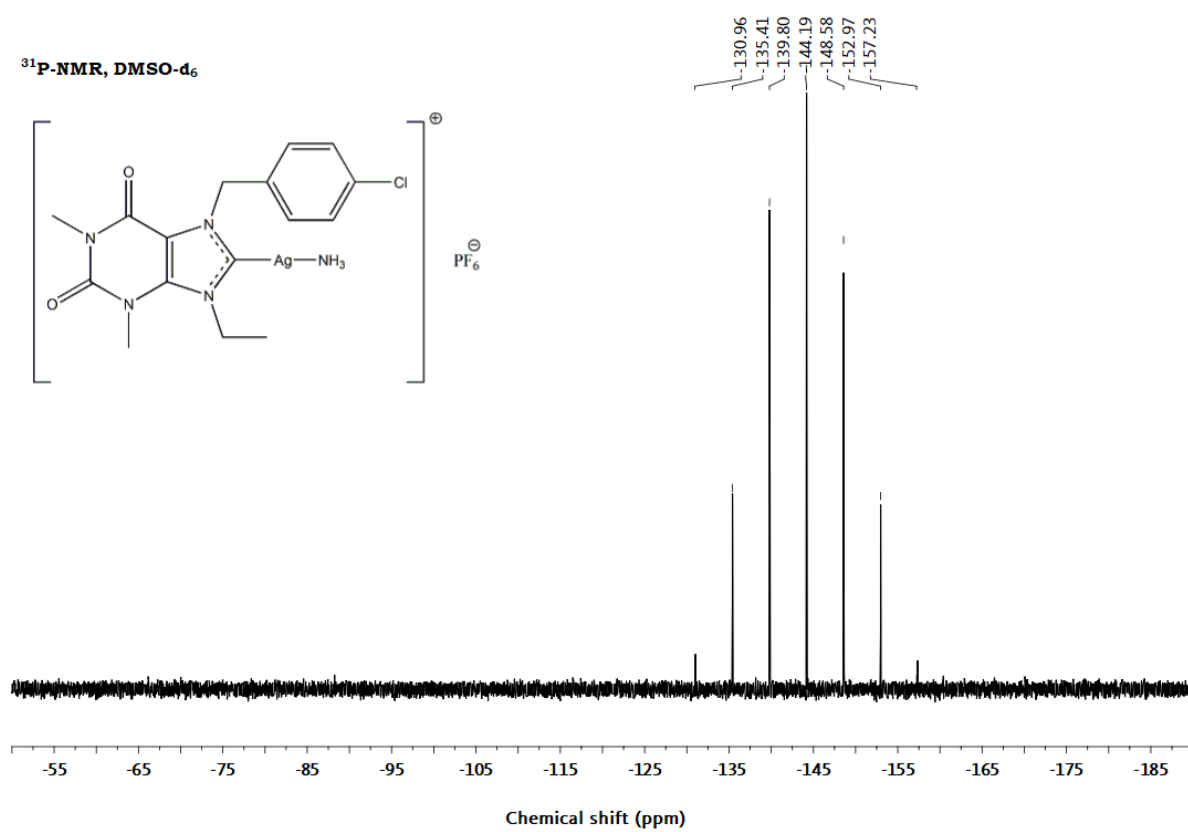

Figure S34



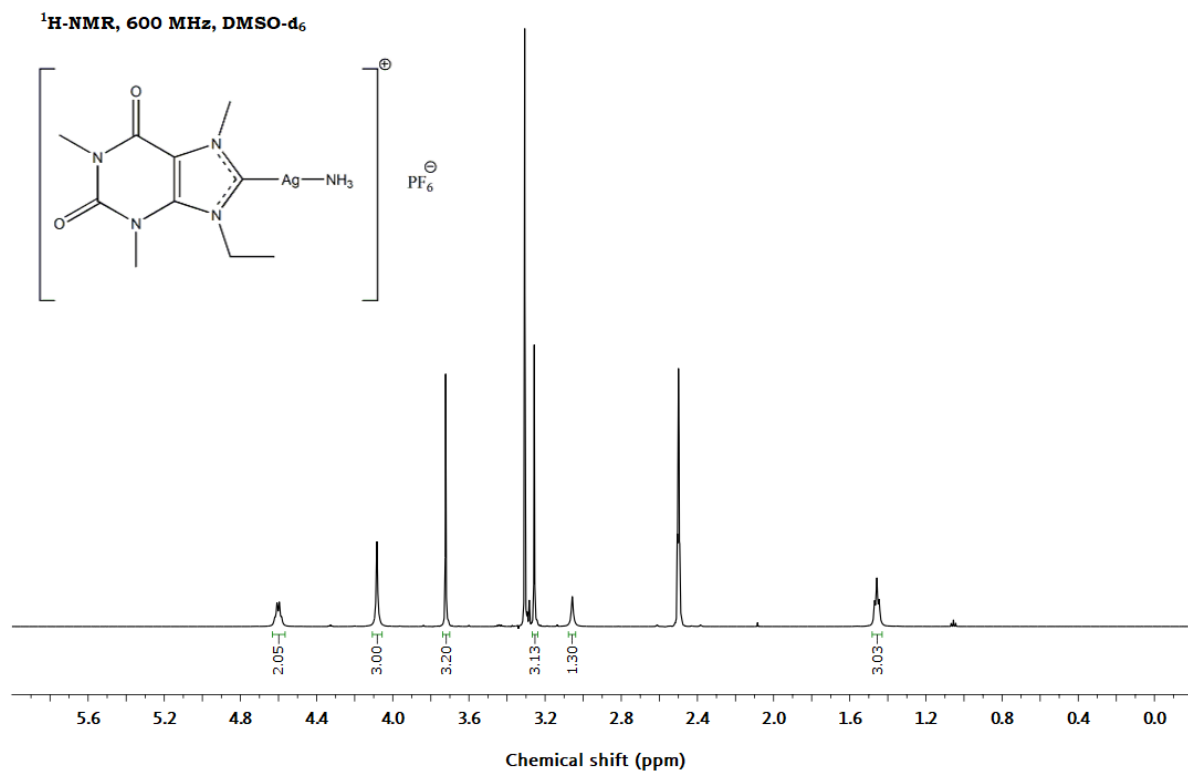

Figure S35

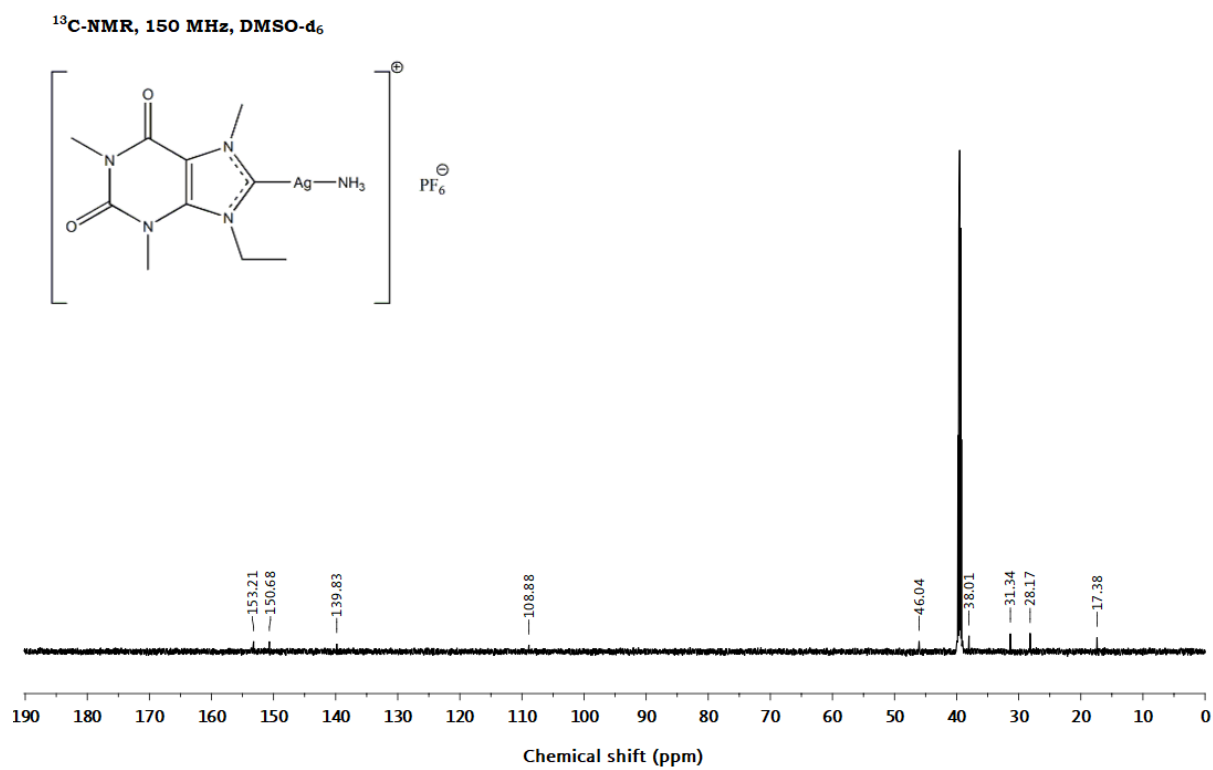

Figure S36

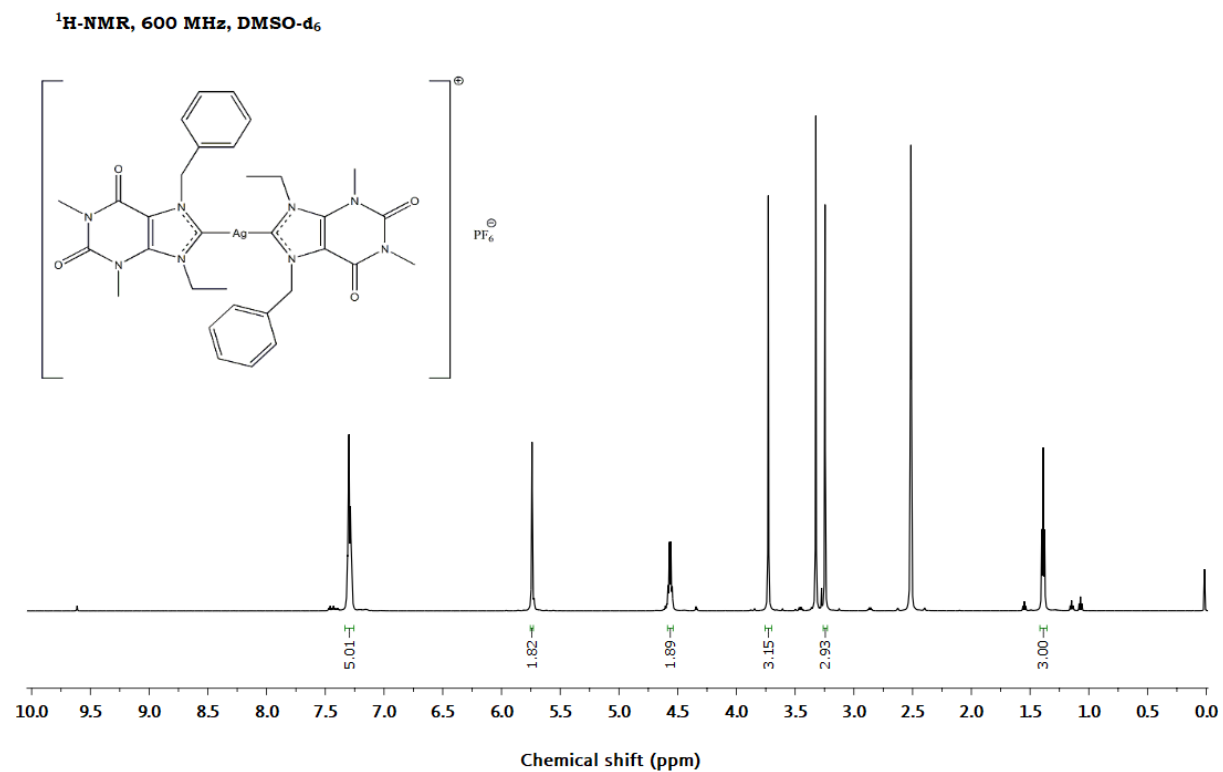

Figure S37

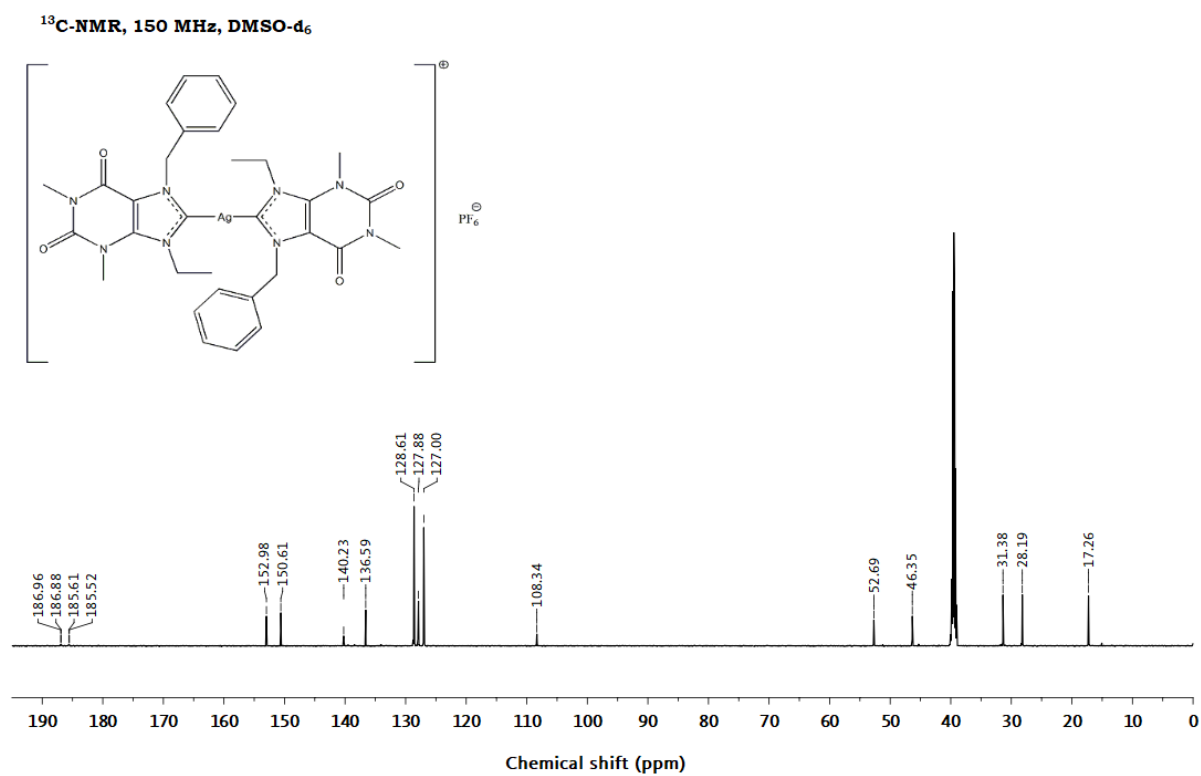

Figure S 38

<sup>31</sup>P-NMR, Acetone-d<sub>6</sub>

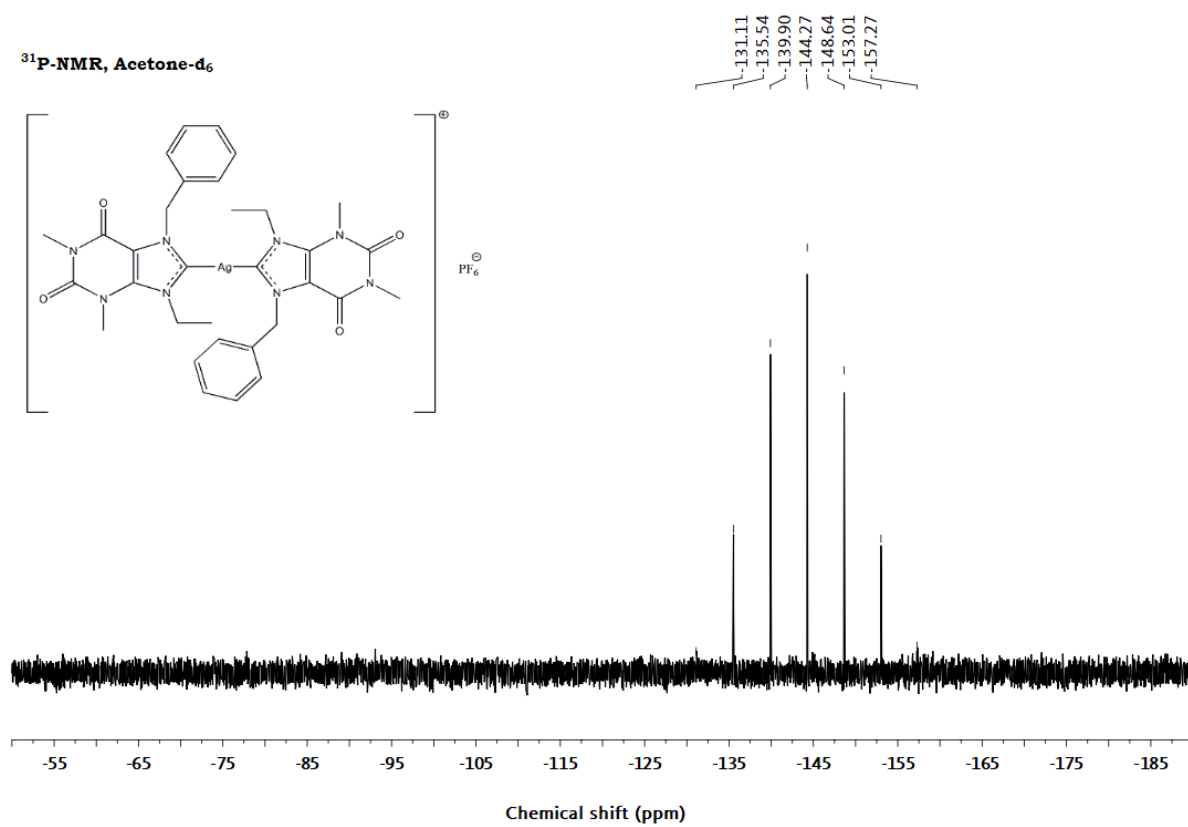

Figure S39

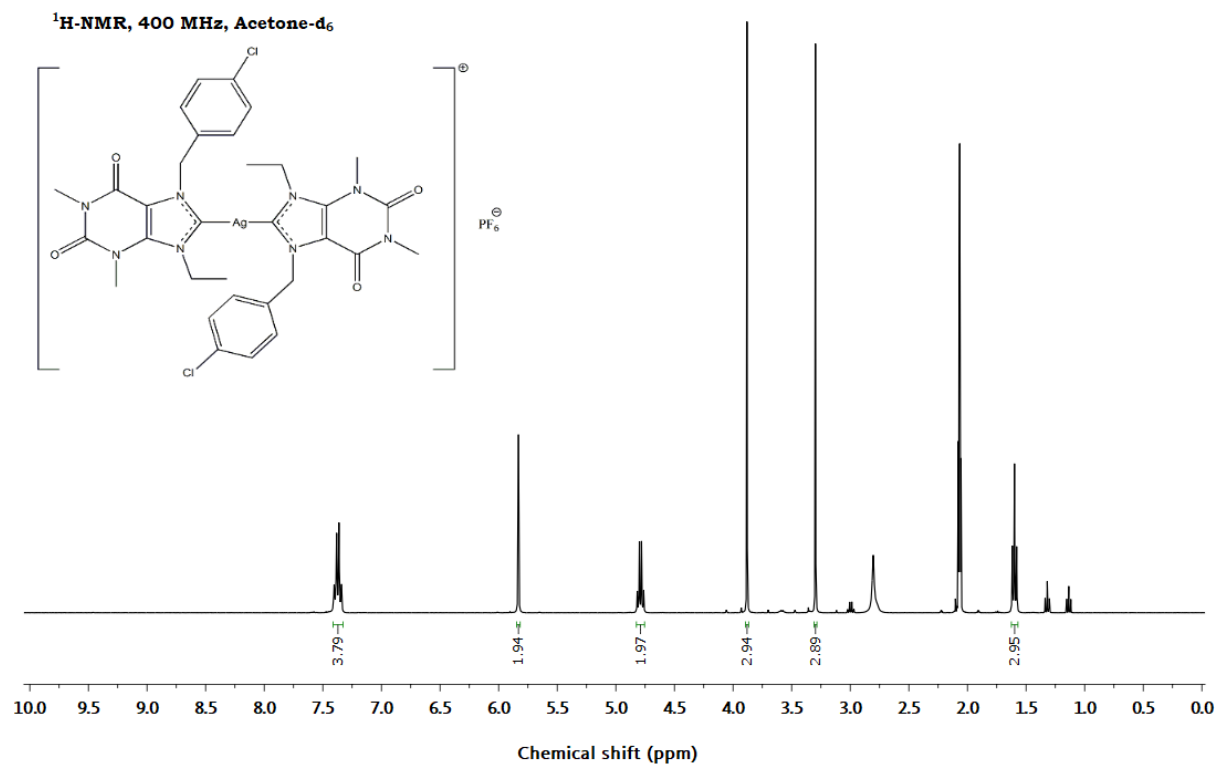

Figure S40

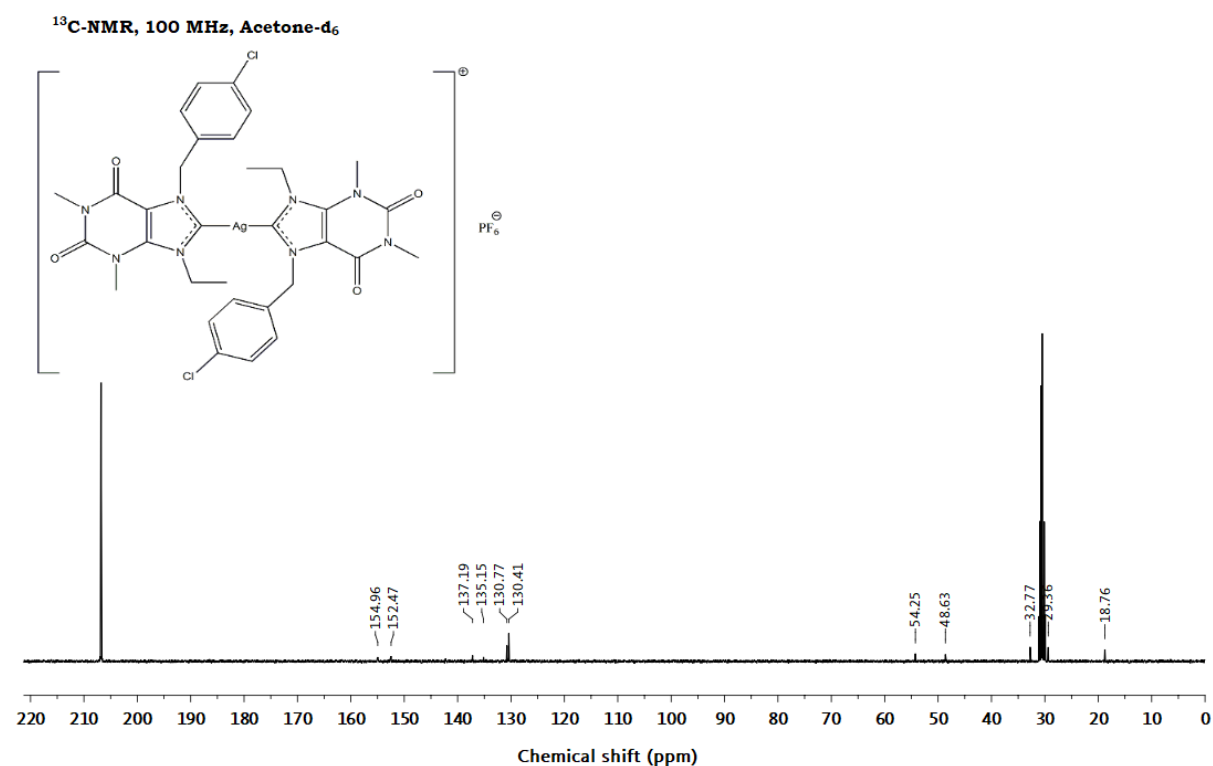

Figure S41

<sup>31</sup>P-NMR, Acetone-d<sub>6</sub>

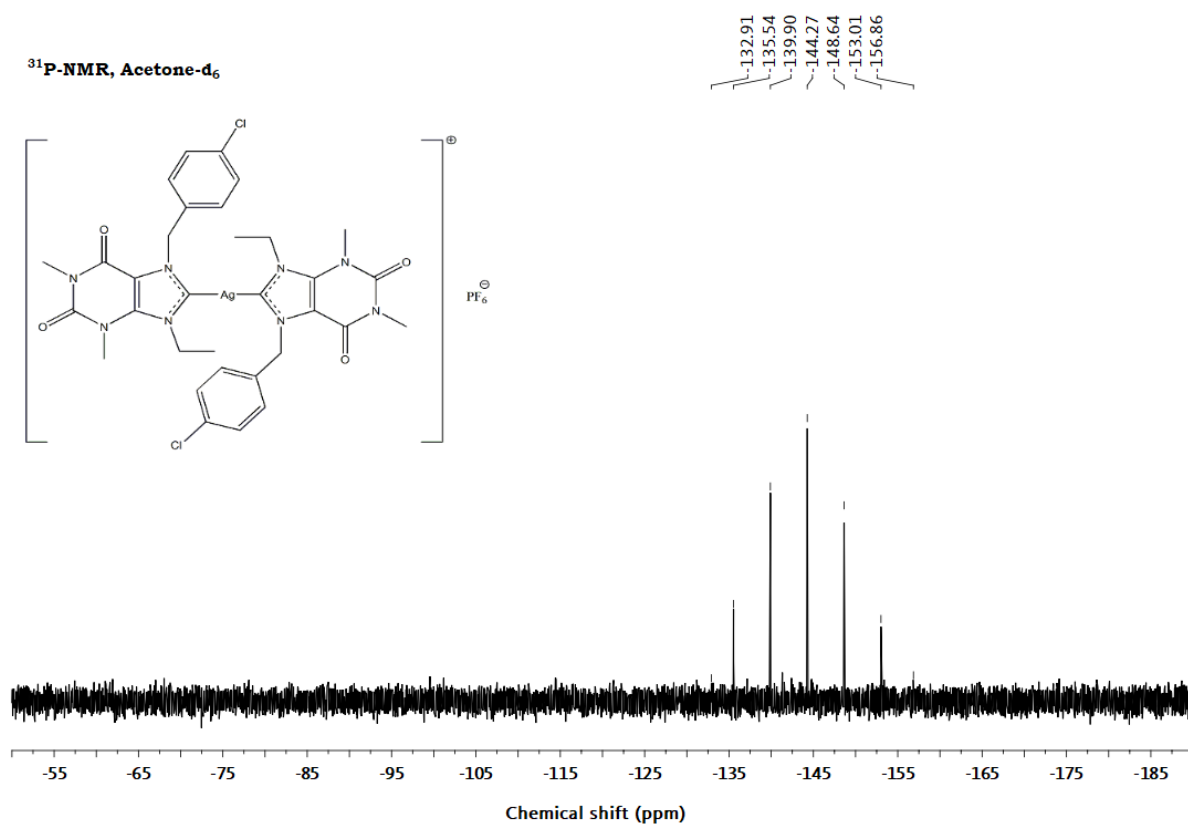

Figure S42

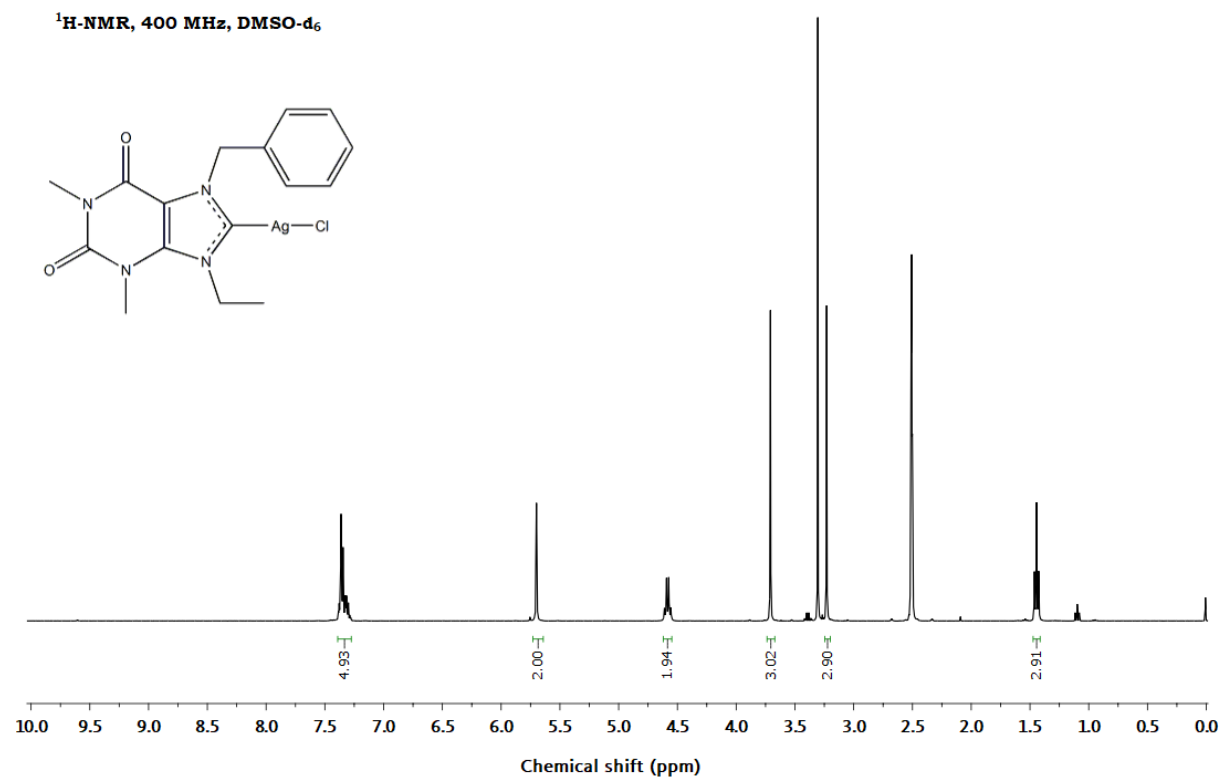

Figure S43

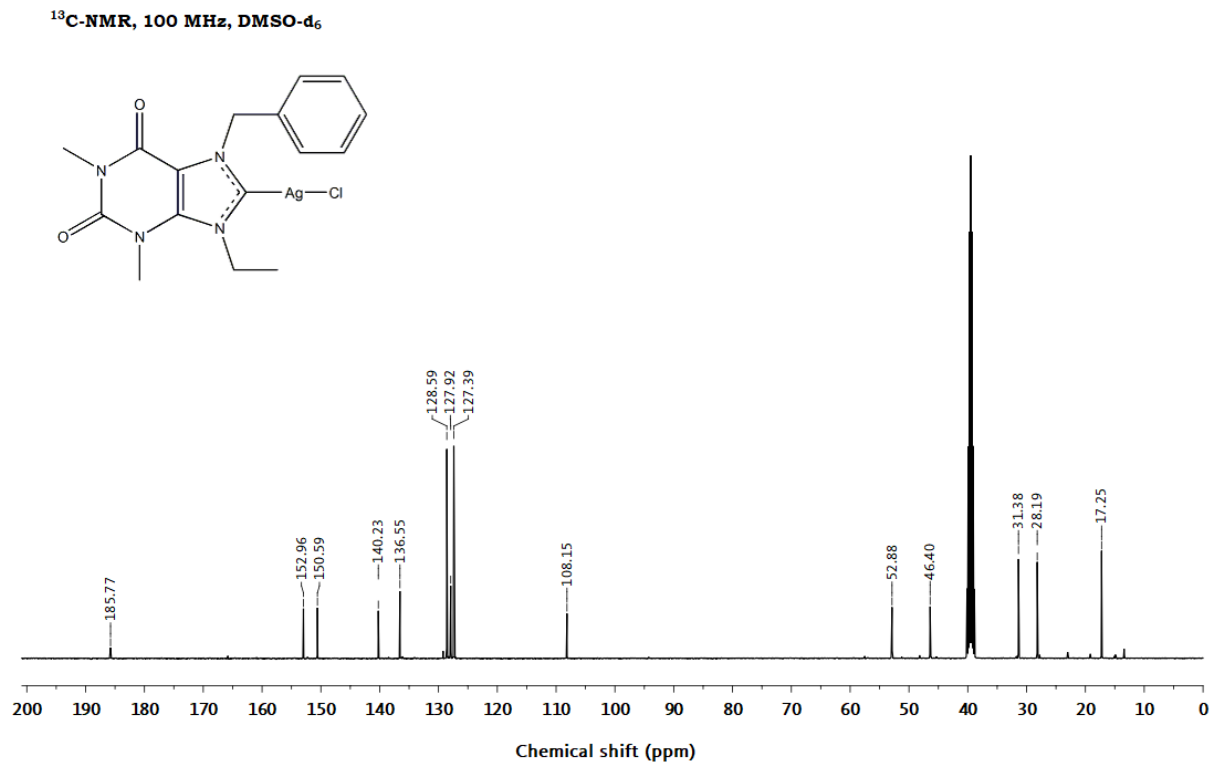

Figure S44

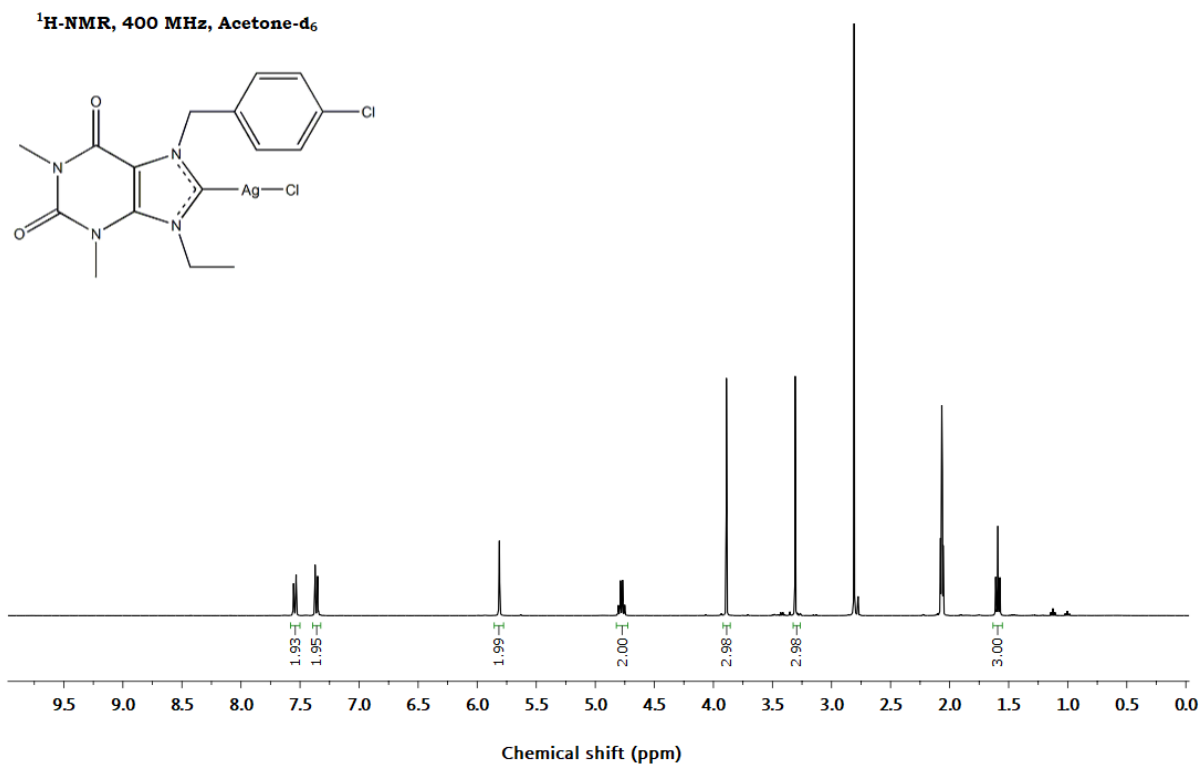

Figure S45

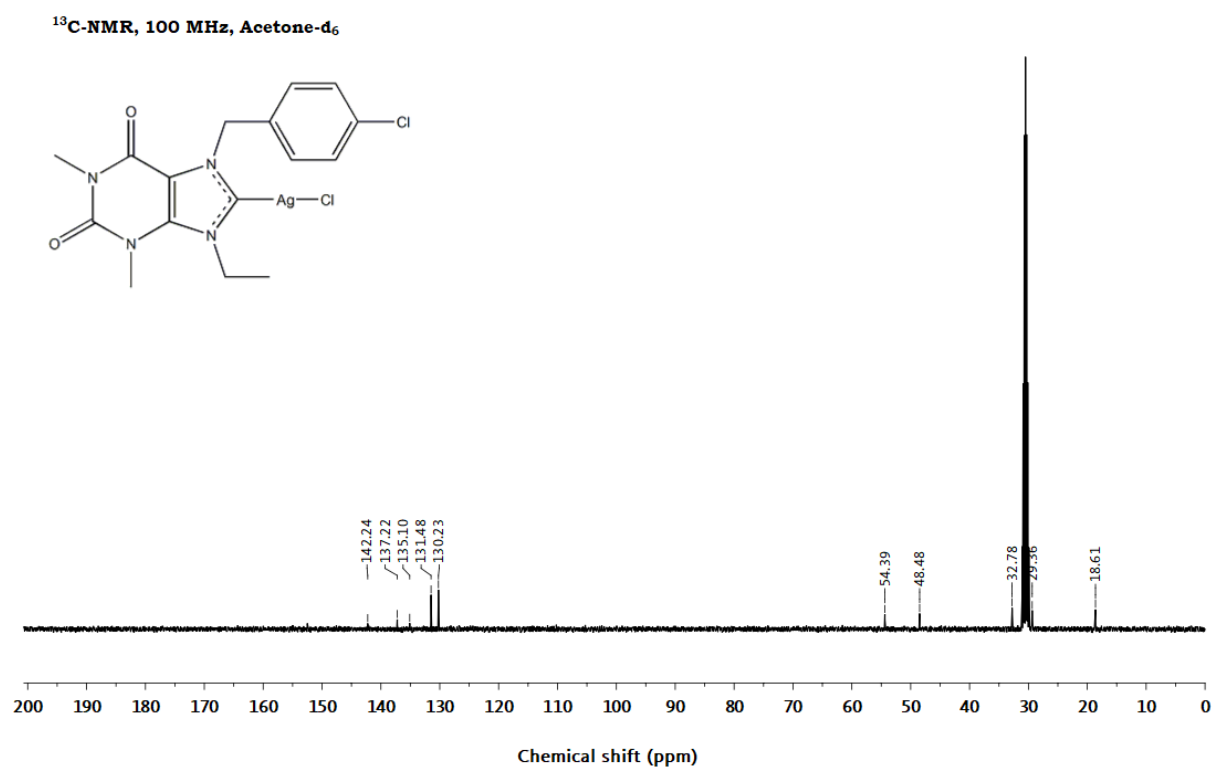

Figure S46

<sup>1</sup>H-NMR, 400 MHz, CDCl<sub>3</sub>, 223 K

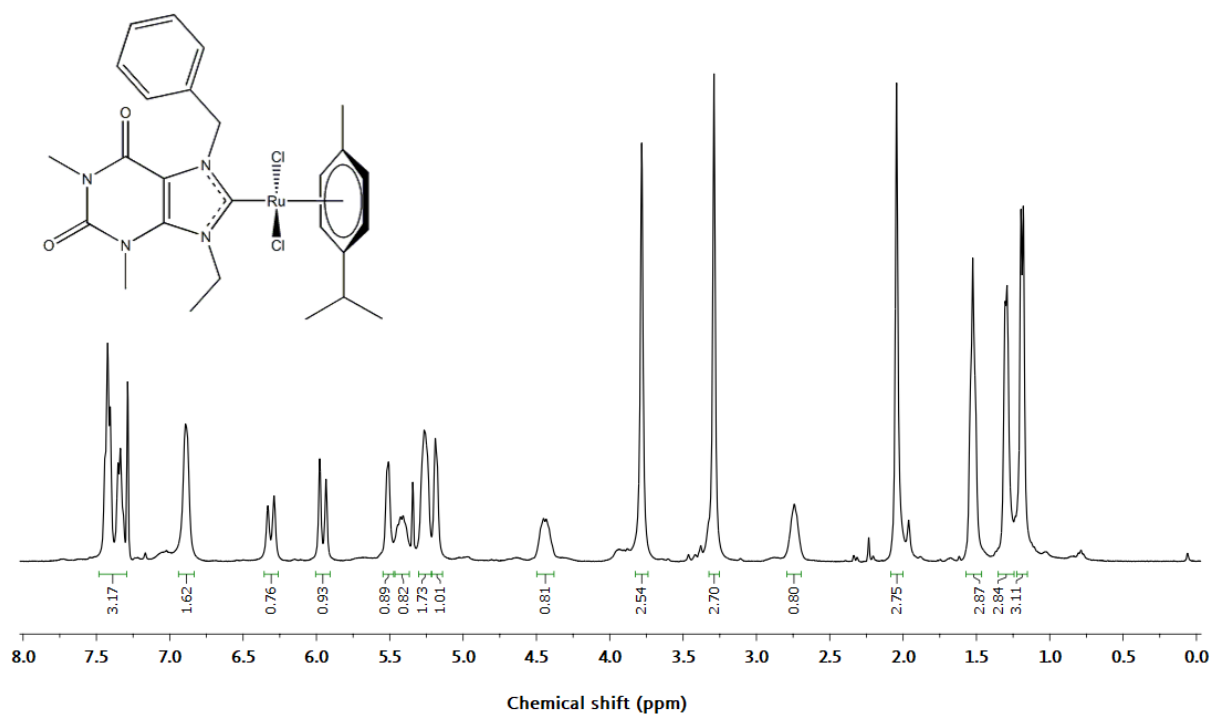

Figure S47

<sup>13</sup>C-NMR, 100 MHz, CDCl<sub>3</sub>, 223 K

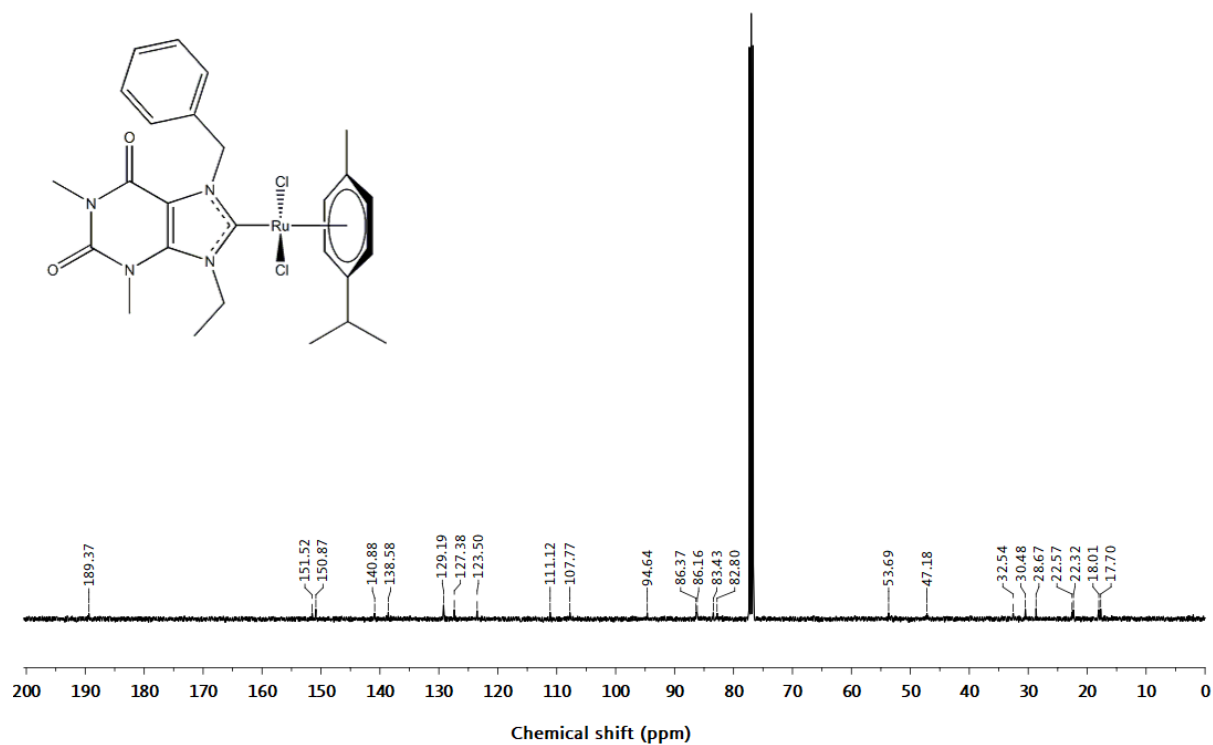

Figure S48



<sup>1</sup>H-NMR, 400 MHz, CDCl<sub>3</sub>, 223 K

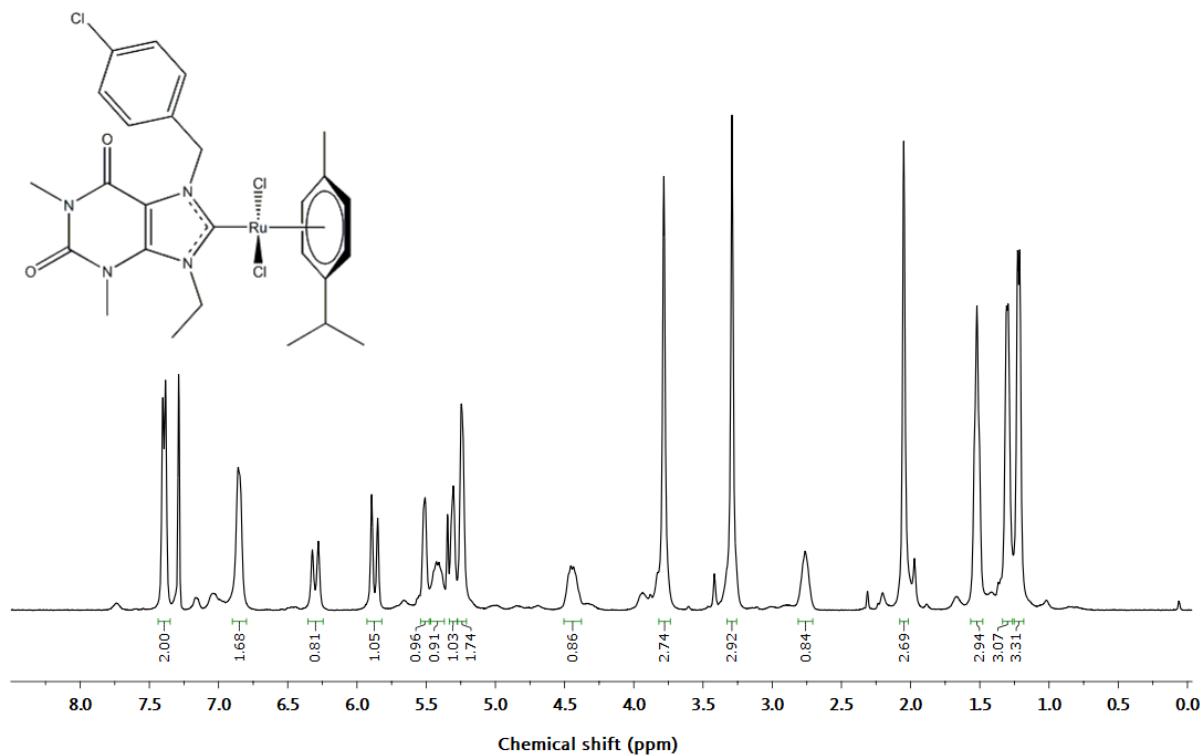

Figure S49

<sup>13</sup>C-NMR, 100 MHz, CDCl<sub>3</sub>, 223 K

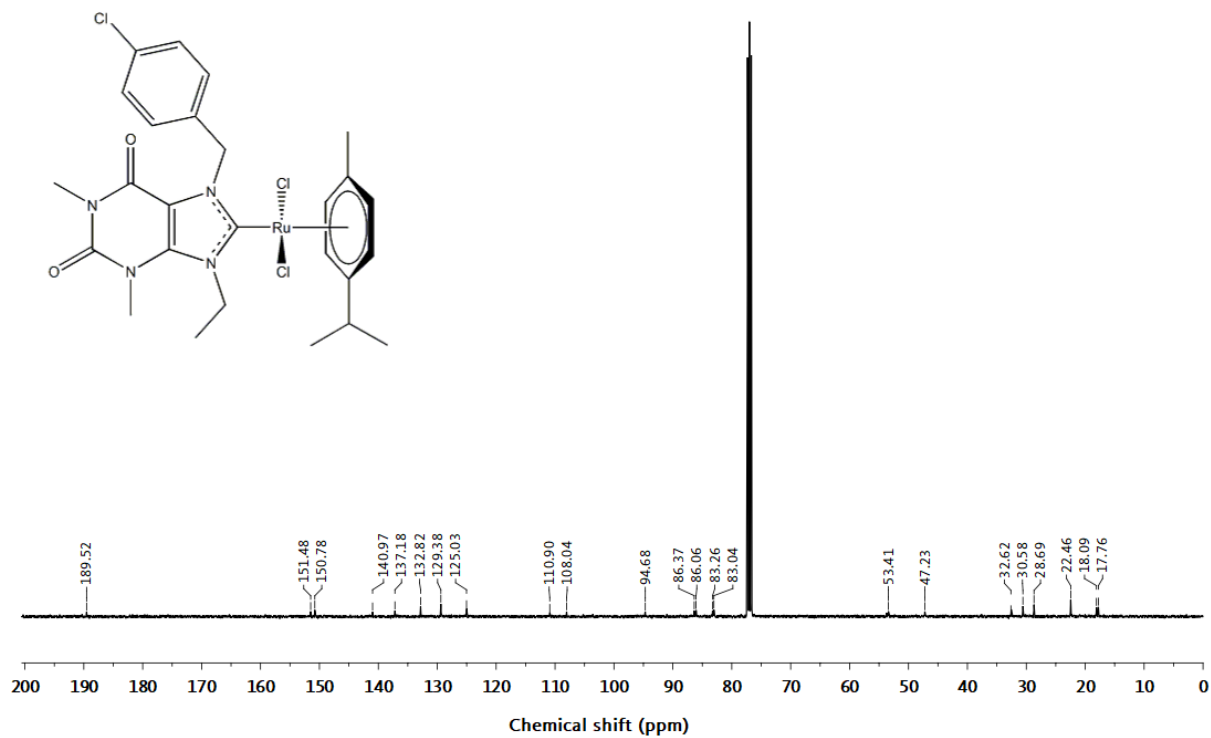

Figure S50

<sup>1</sup>H-NMR, 600 MHz, CDCl<sub>3</sub>

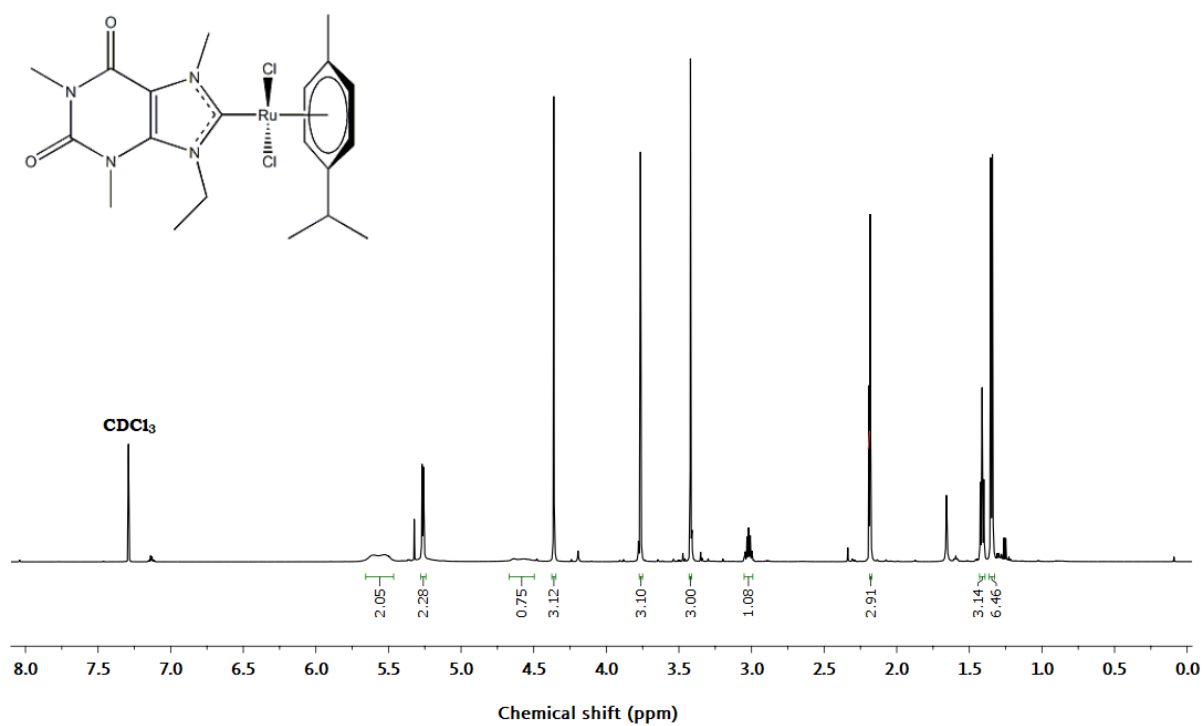

Figure S51

<sup>13</sup>C-NMR, 150 MHz, CDCl<sub>3</sub>

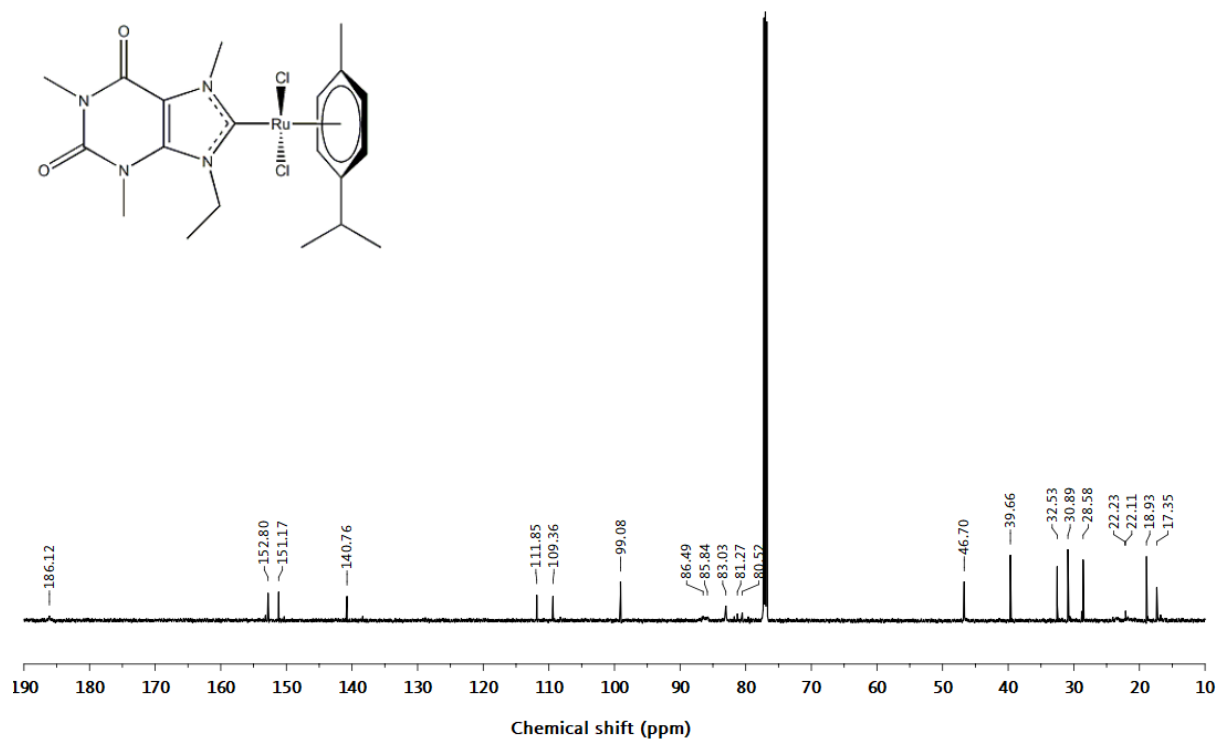

Figure S52

<sup>1</sup>H-NMR, 400 MHz, CDCl<sub>3</sub>

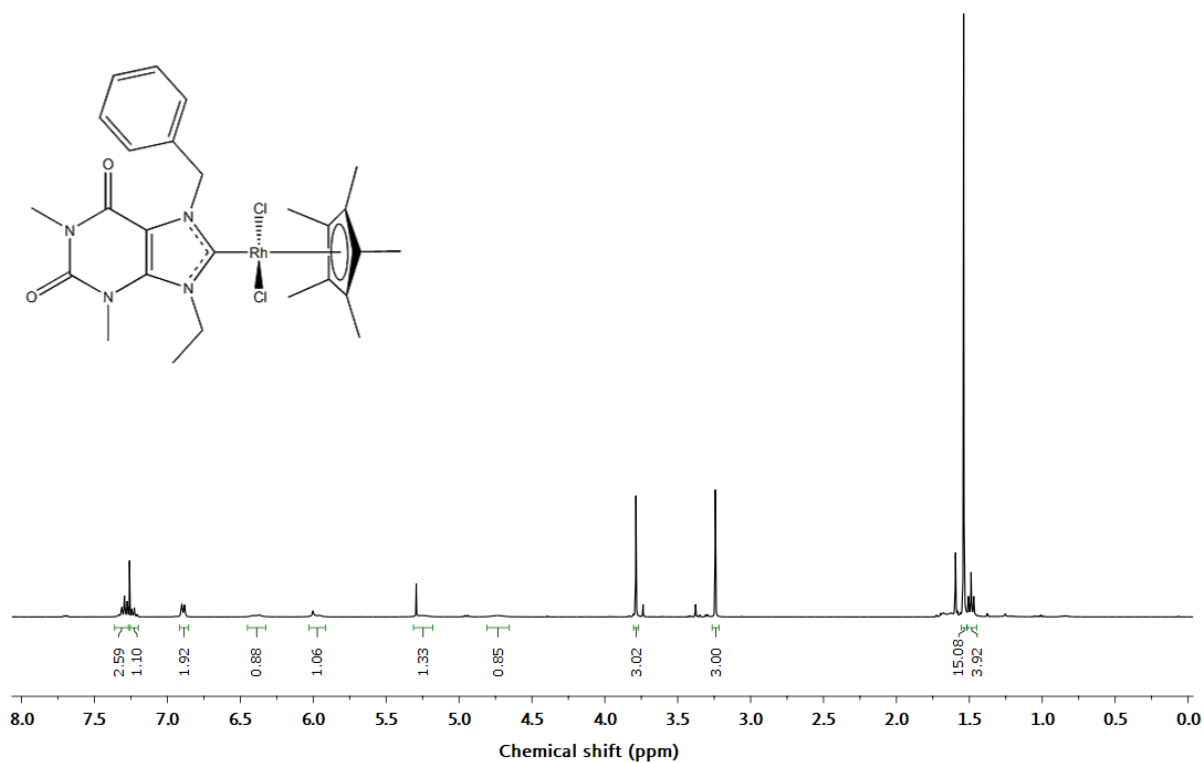

Figure S53

<sup>13</sup>C-NMR, 150 MHz, CDCl<sub>3</sub>

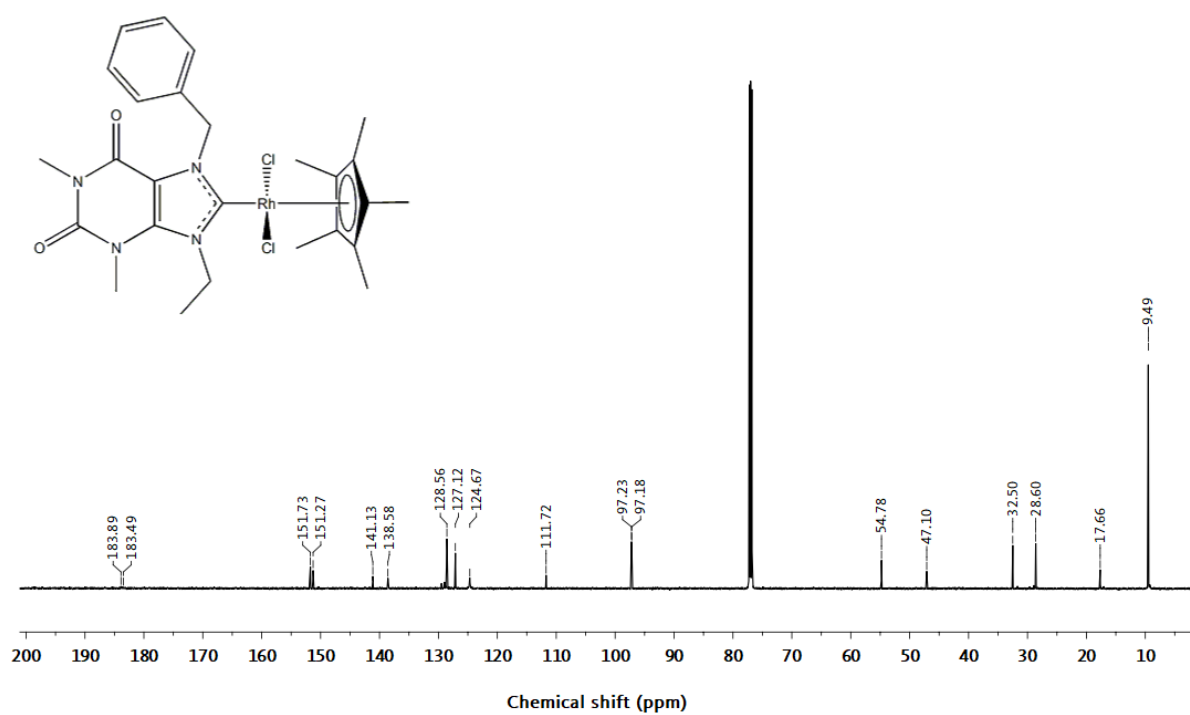

Figure S54

<sup>1</sup>H-NMR, 400 MHz, CDCl<sub>3</sub>

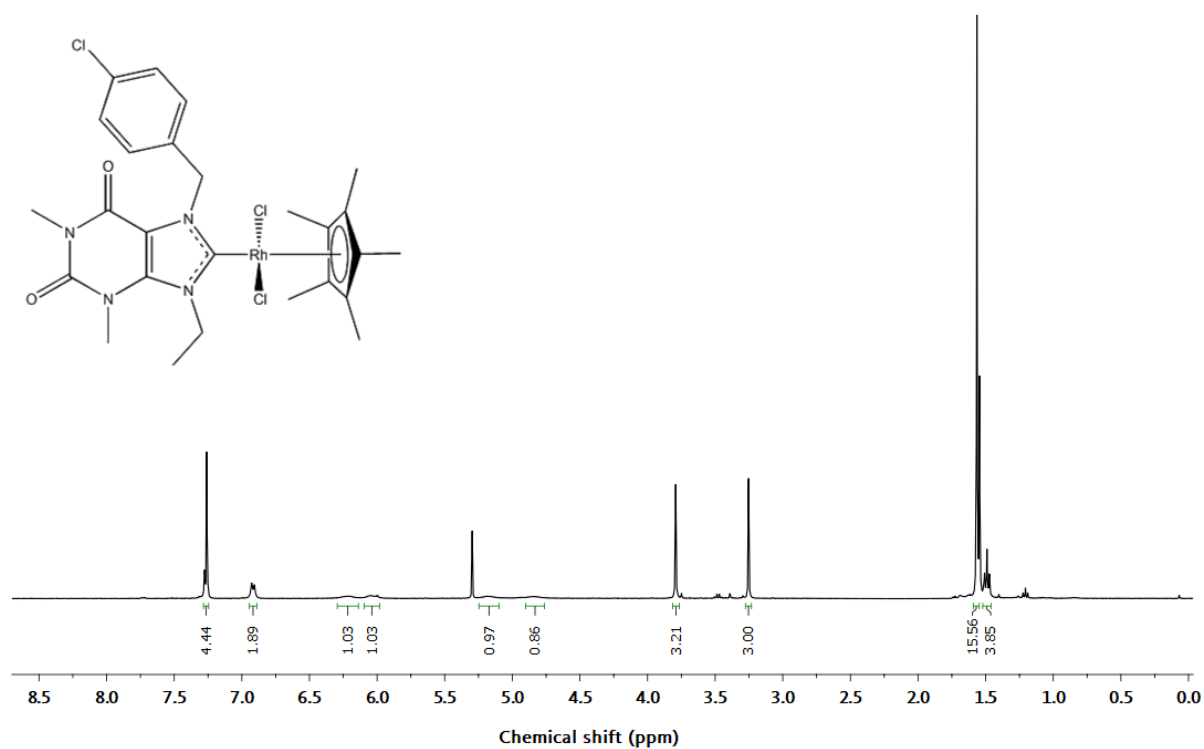

Figure S55

<sup>13</sup>C-NMR, 150 MHz, CDCl<sub>3</sub>

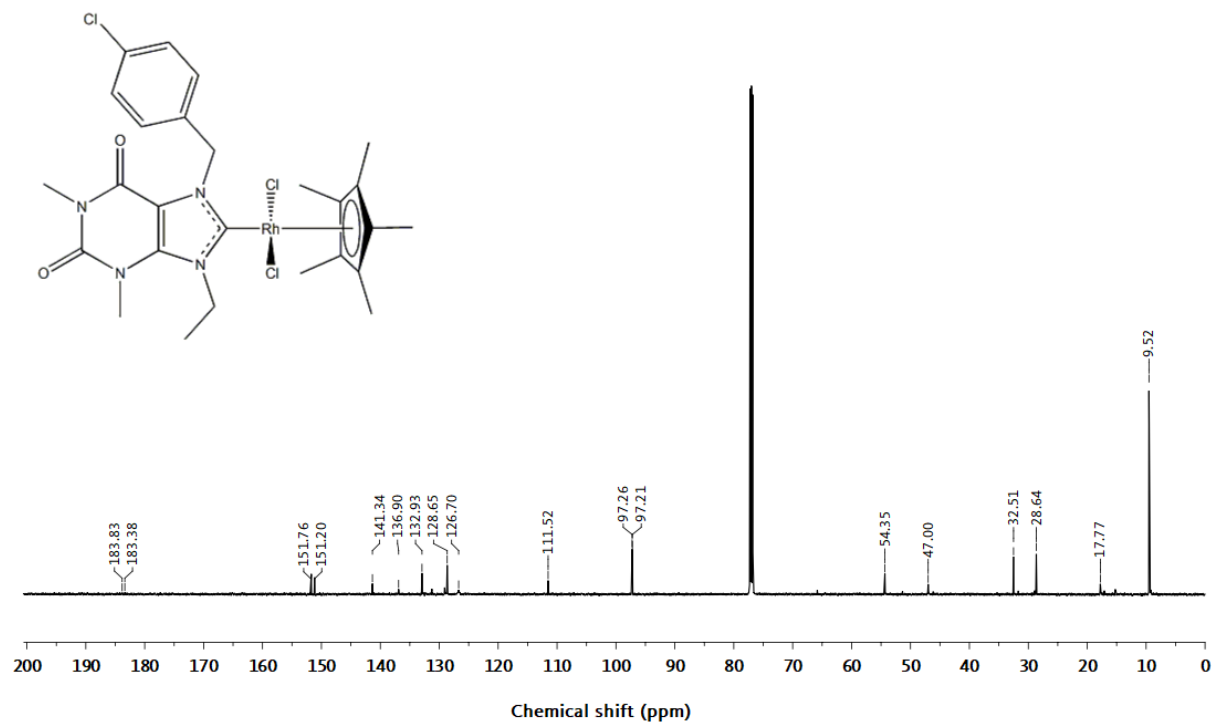

Figure S56

<sup>1</sup>H-NMR, 600 MHz, CDCl<sub>3</sub>

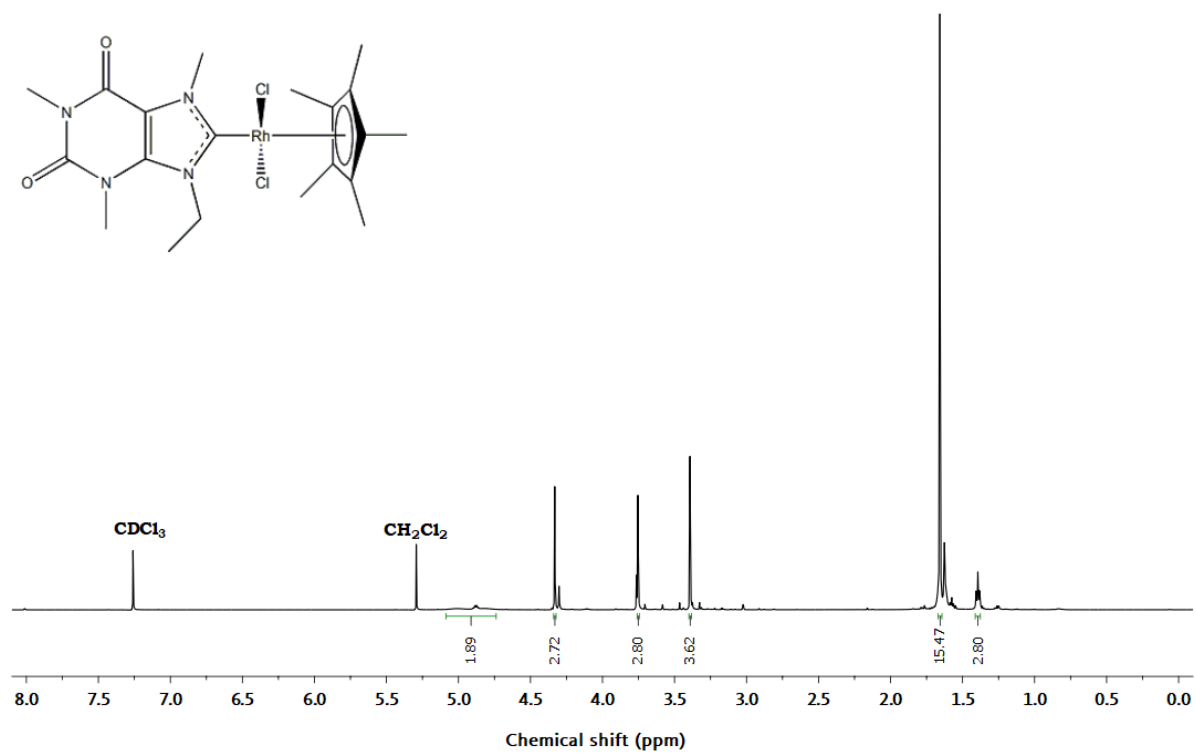

Figure S57

<sup>13</sup>C-NMR, 150 MHz, CDCl<sub>3</sub>

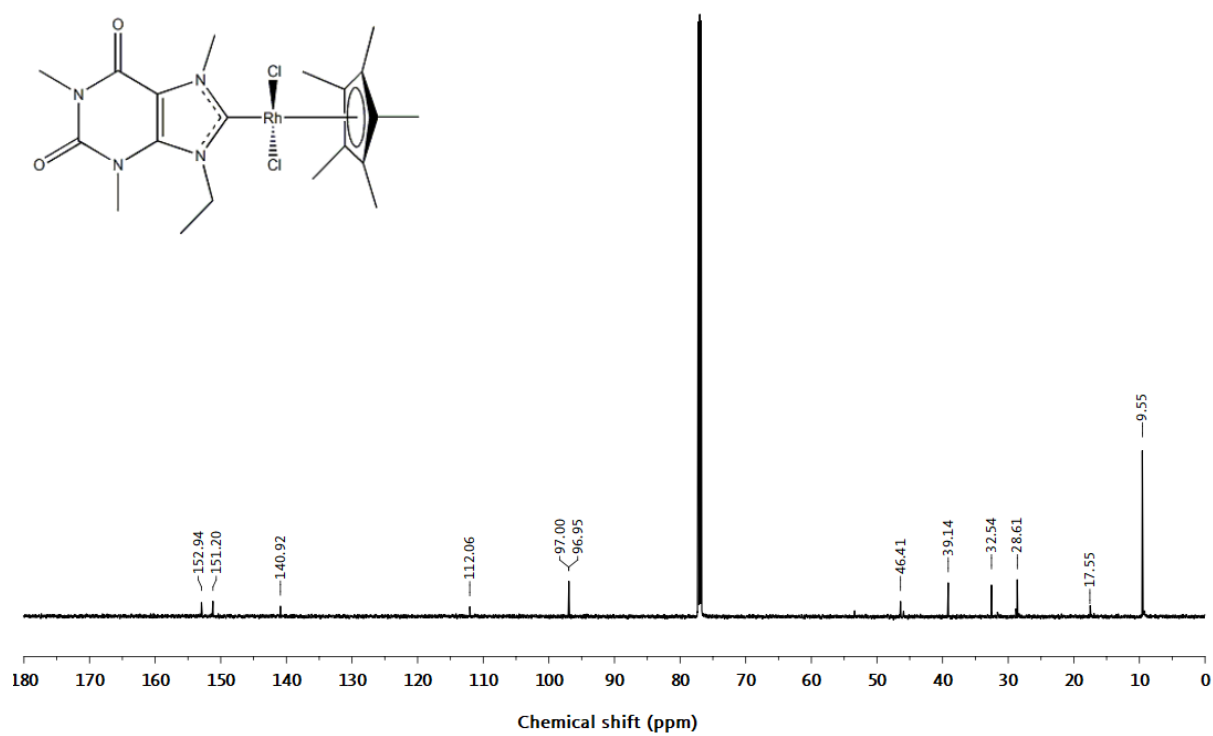

Figure S58

<sup>1</sup>H-NMR, 400 MHz, CDCl<sub>3</sub>

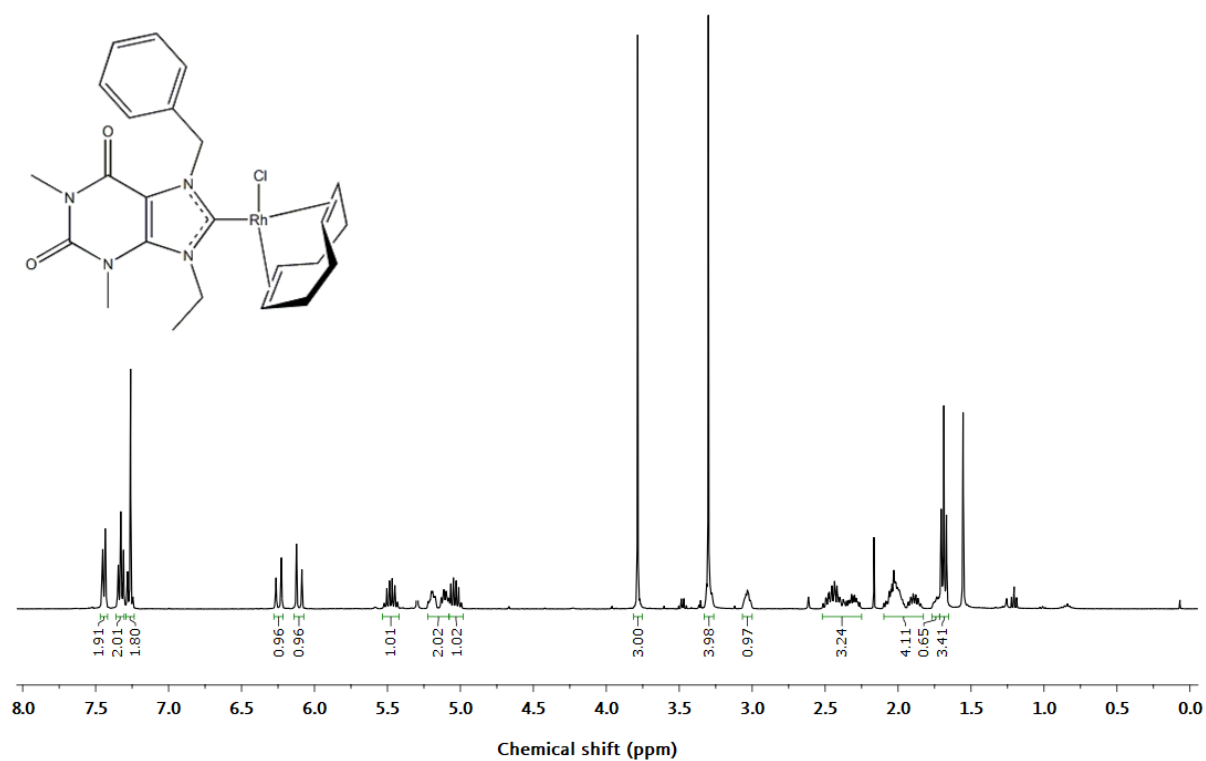

Figure S59

<sup>13</sup>C-NMR, 100 MHz, CDCl<sub>3</sub>

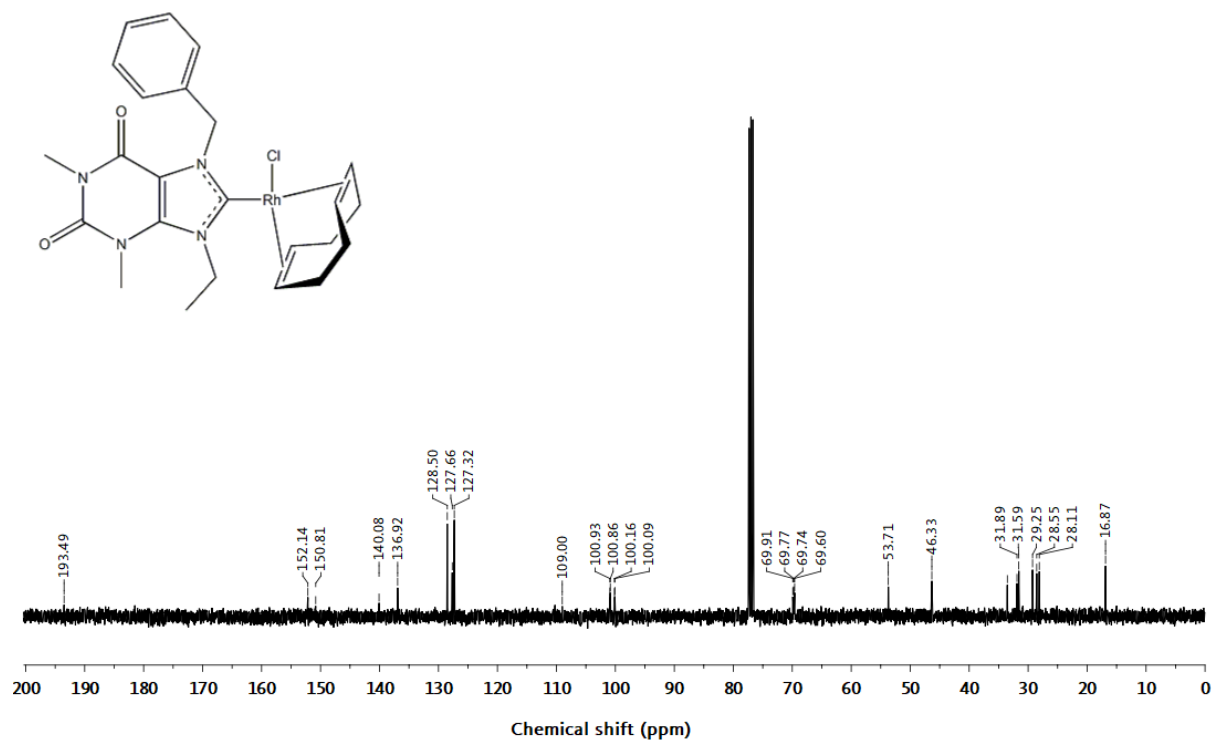

Figure S60

<sup>1</sup>H-NMR, 400 MHz, CDCl<sub>3</sub>

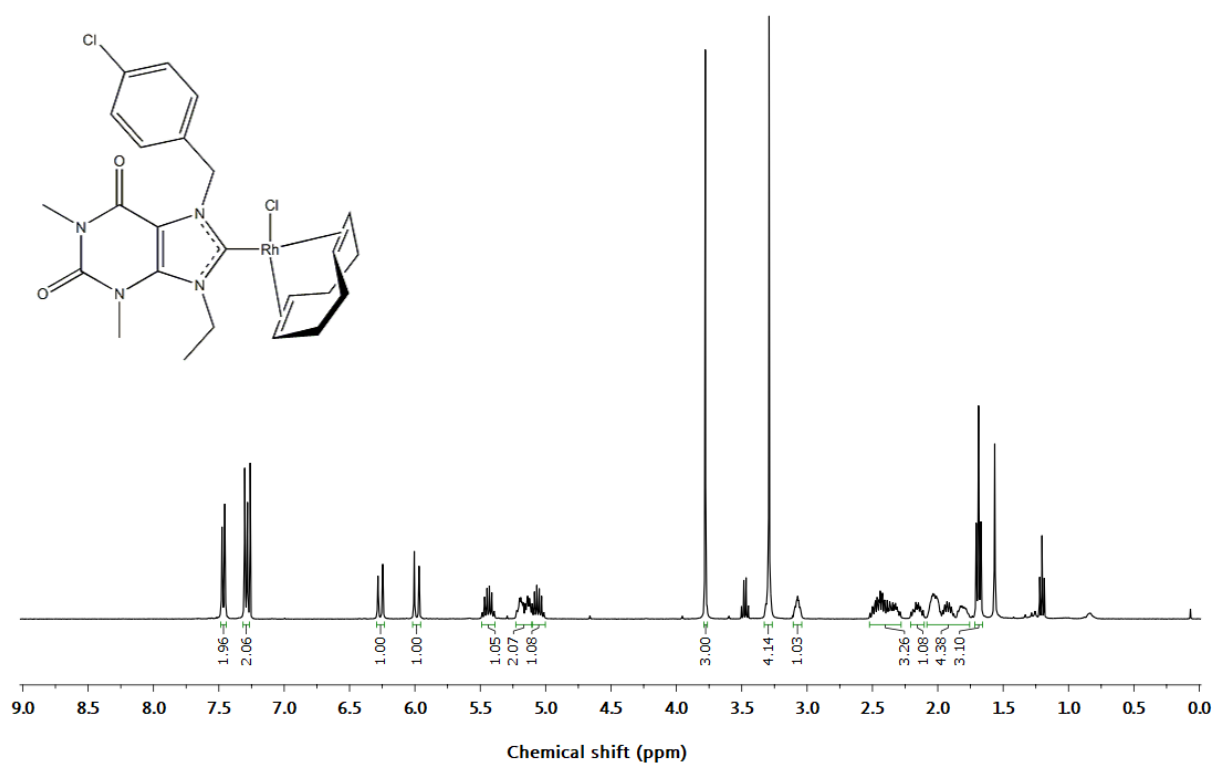

Figure S61

<sup>13</sup>C-NMR, 100 MHz, CDCl<sub>3</sub>

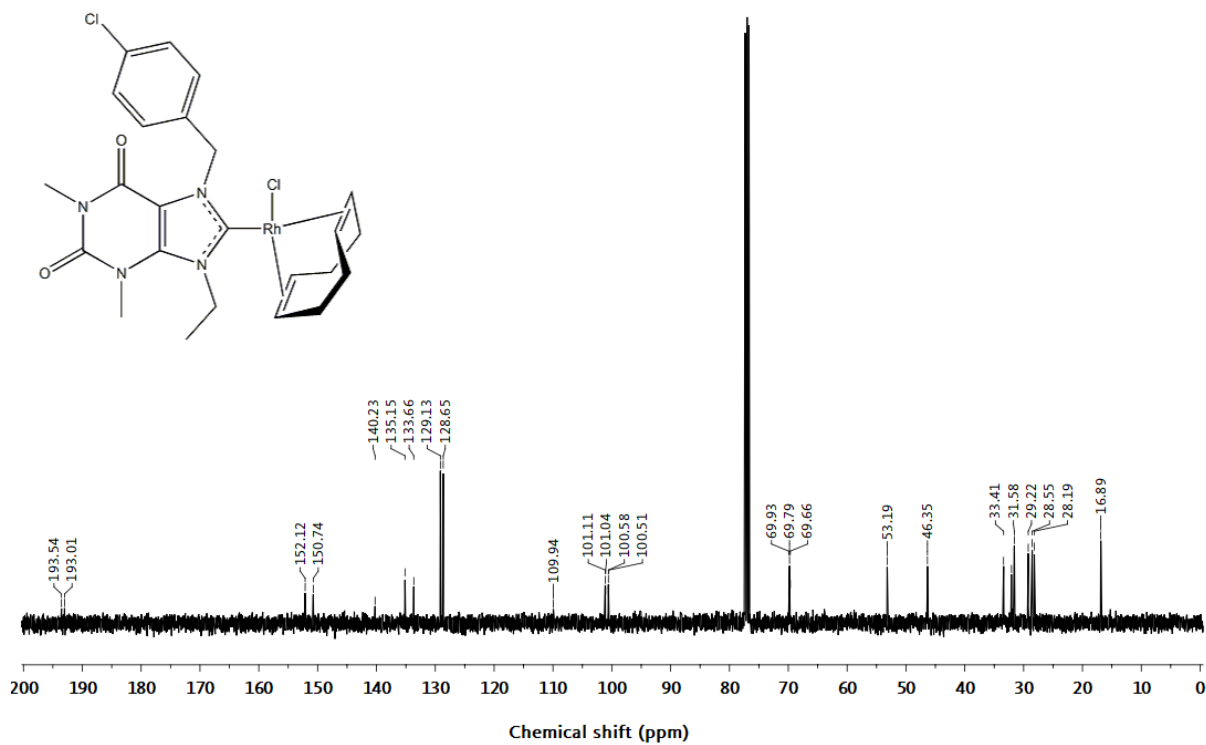

Figure S62

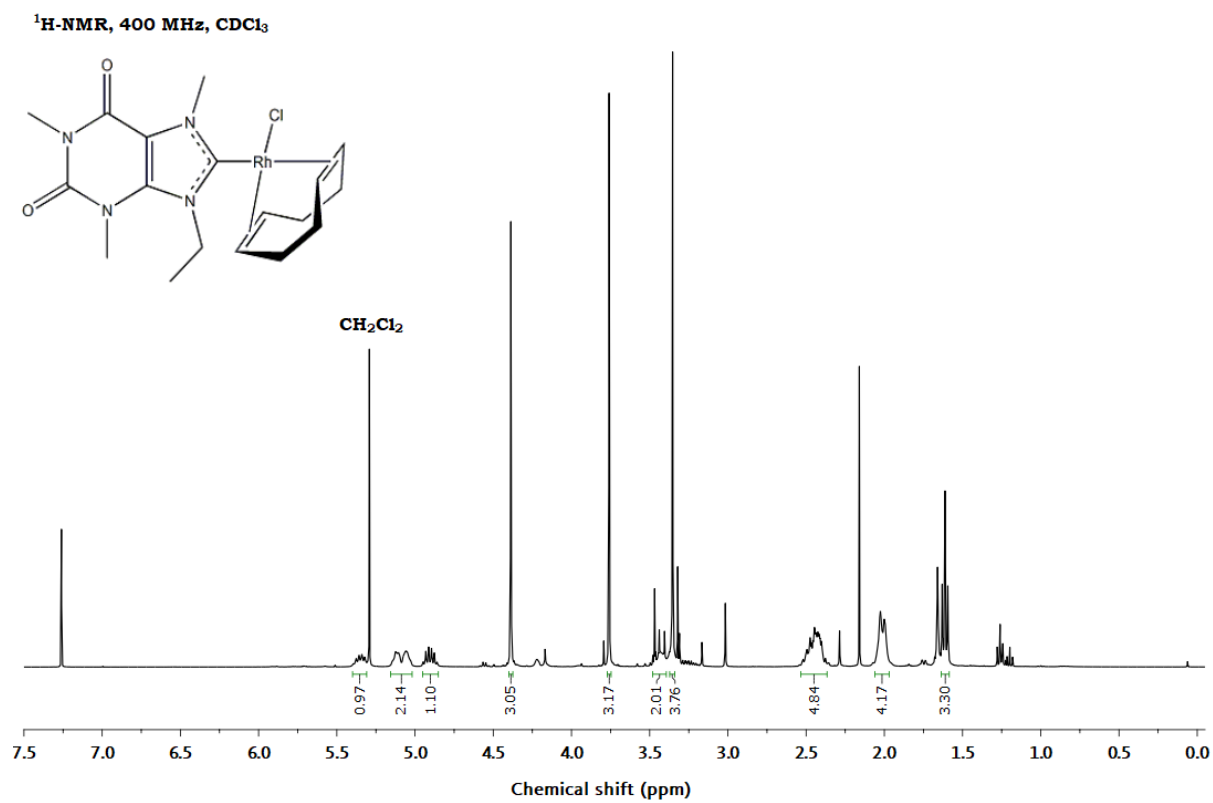

Figure S63

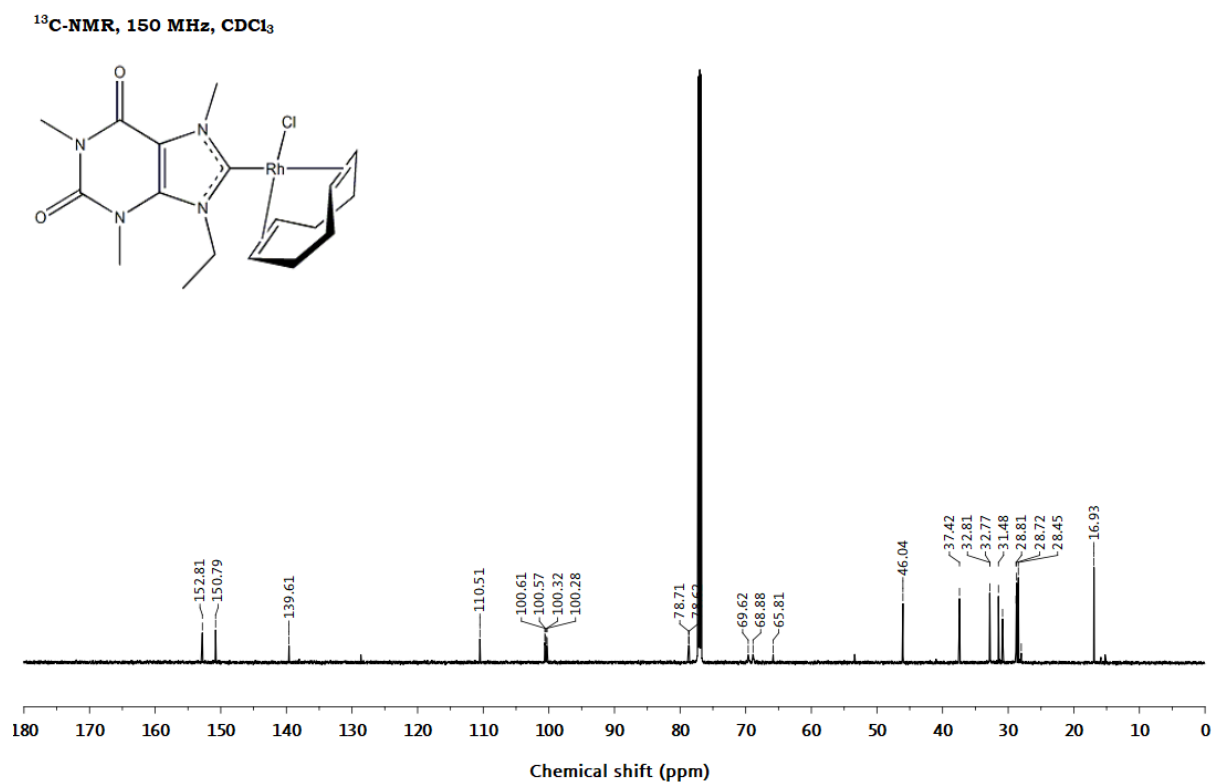

Figure S64



<sup>1</sup>H-NMR, 600 MHz, CDCl<sub>3</sub>

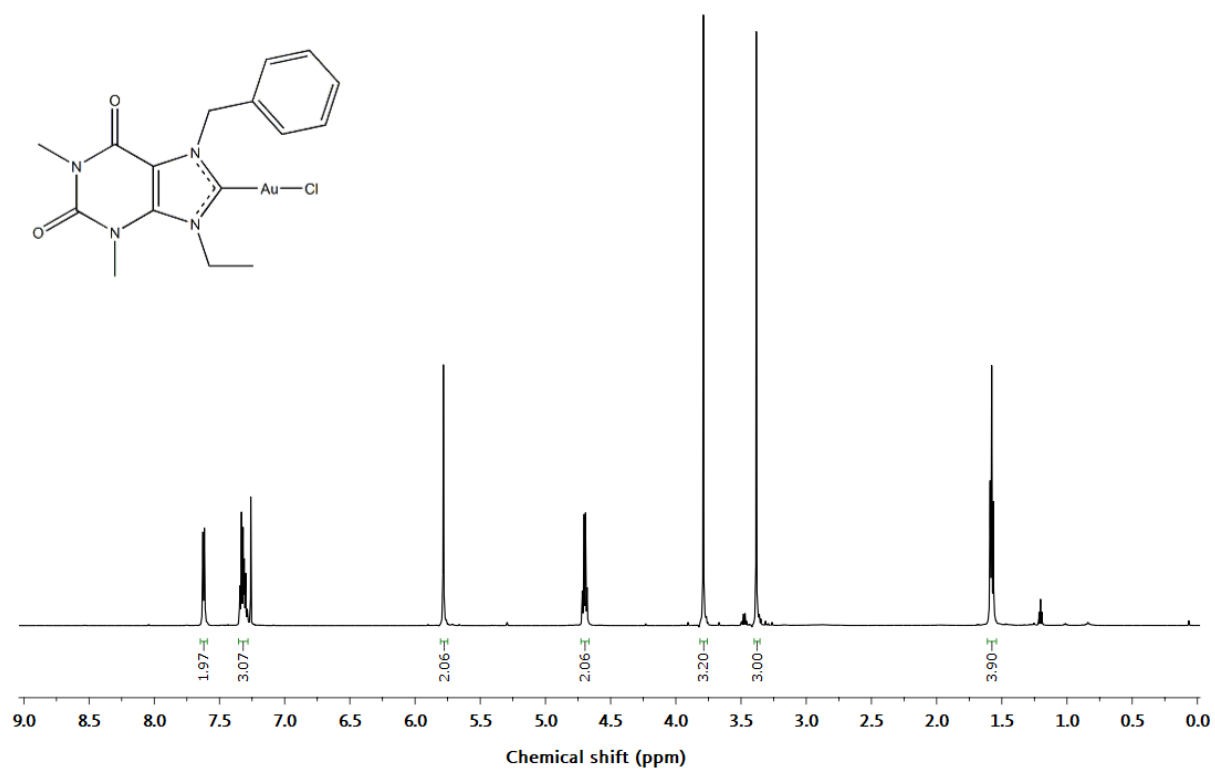

Figure S65

<sup>13</sup>C-NMR, 150 MHz, CDCl<sub>3</sub>

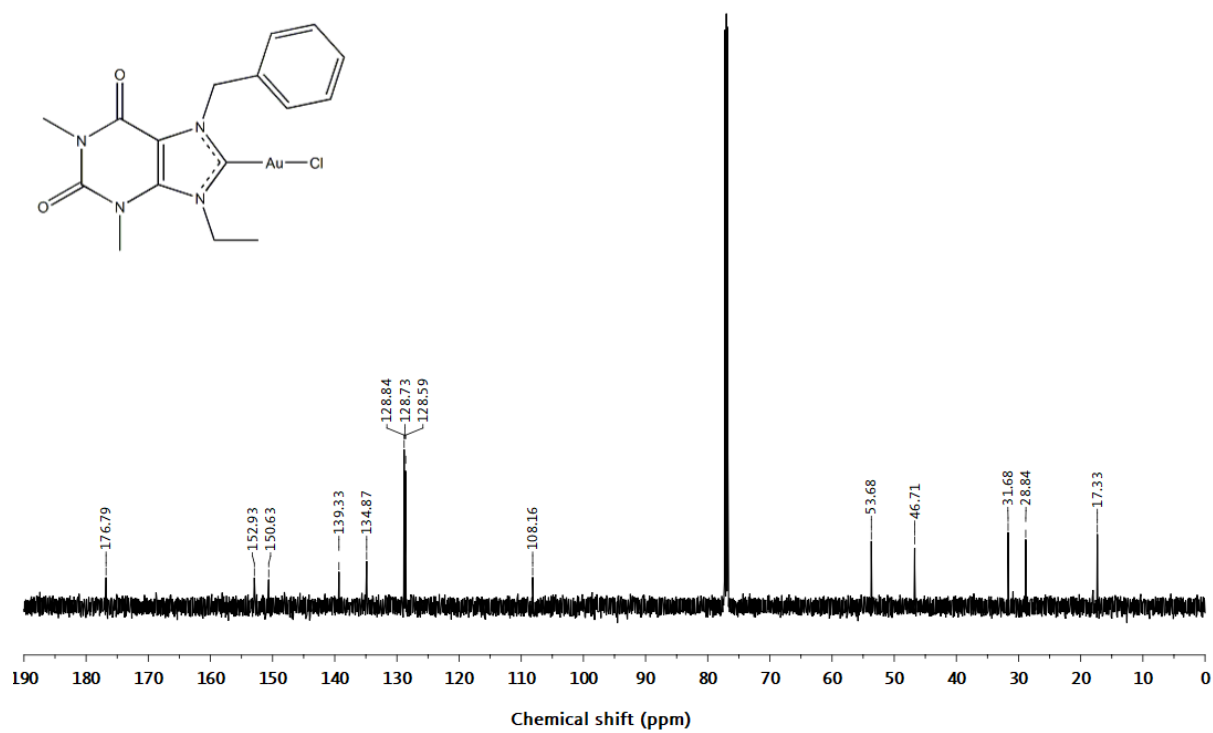

Figure S66

<sup>1</sup>H-NMR, 600 MHz, CDCl<sub>3</sub>

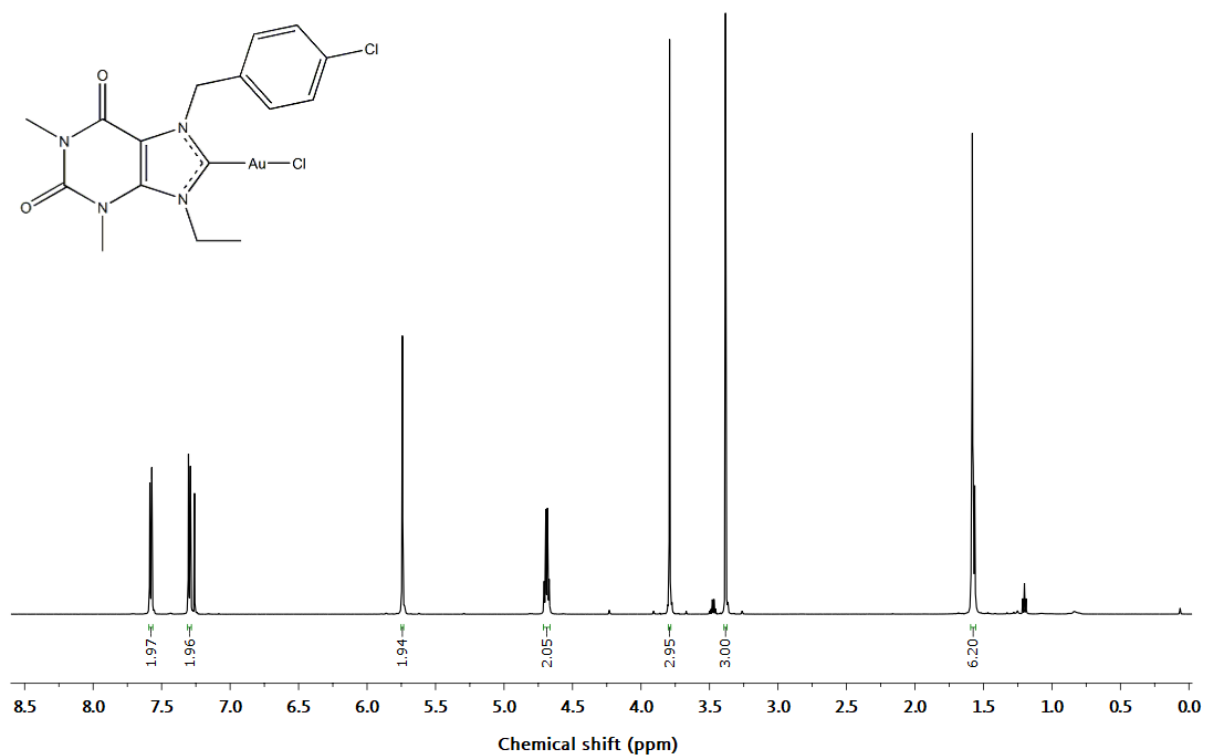

Figure S67

<sup>13</sup>C-NMR, 150 MHz, CDCl<sub>3</sub>

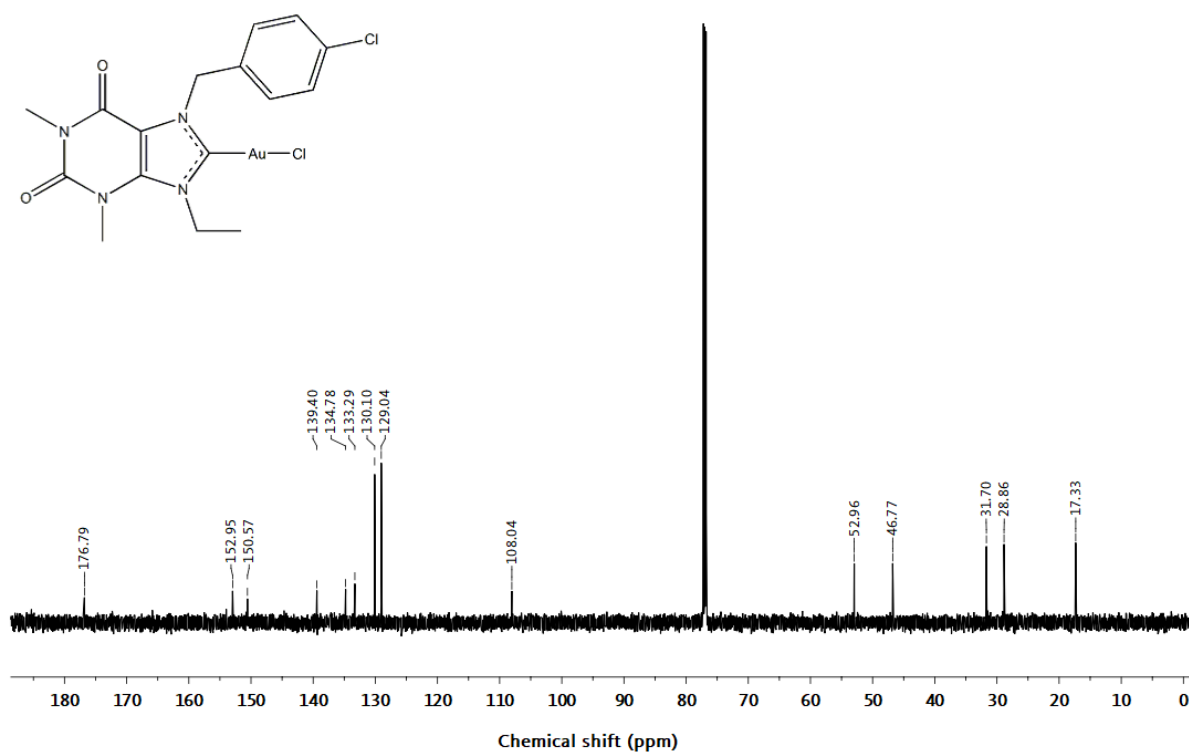

Figure S68

<sup>1</sup>H-NMR, 400 MHz, CDCl<sub>3</sub>

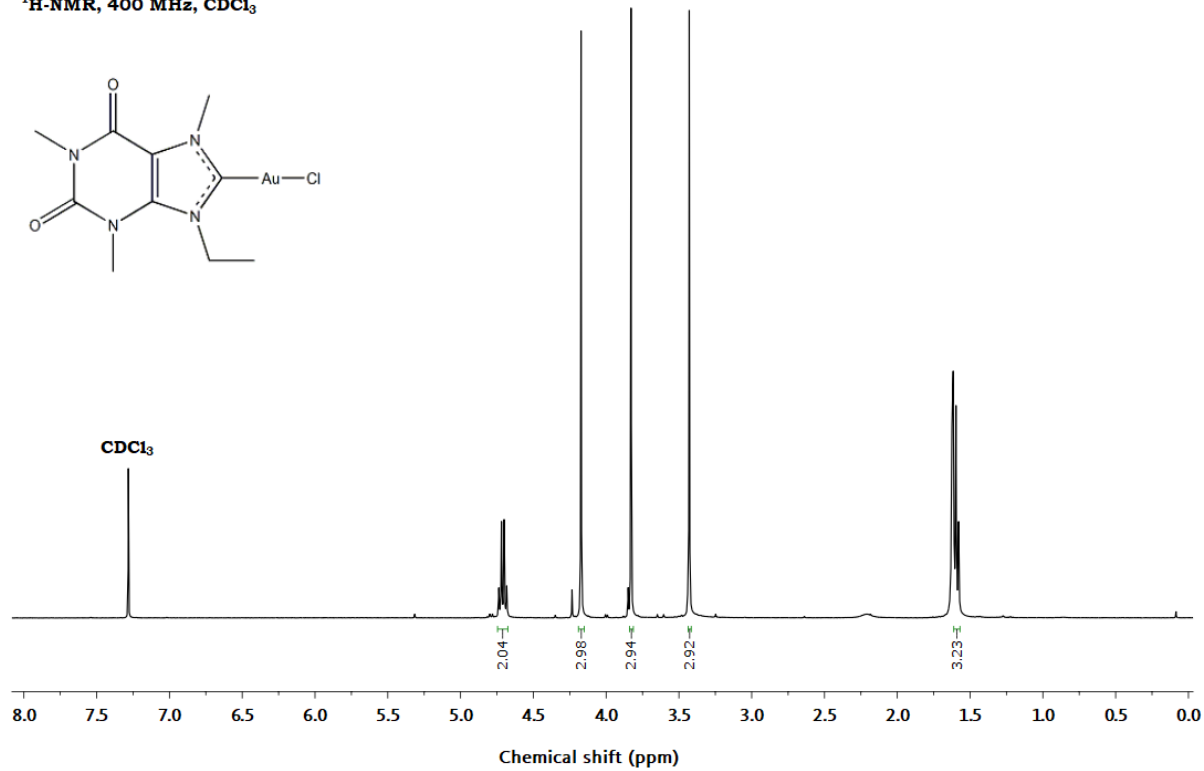

Figure S69

<sup>13</sup>C-NMR, 100 MHz, CDCl<sub>3</sub>

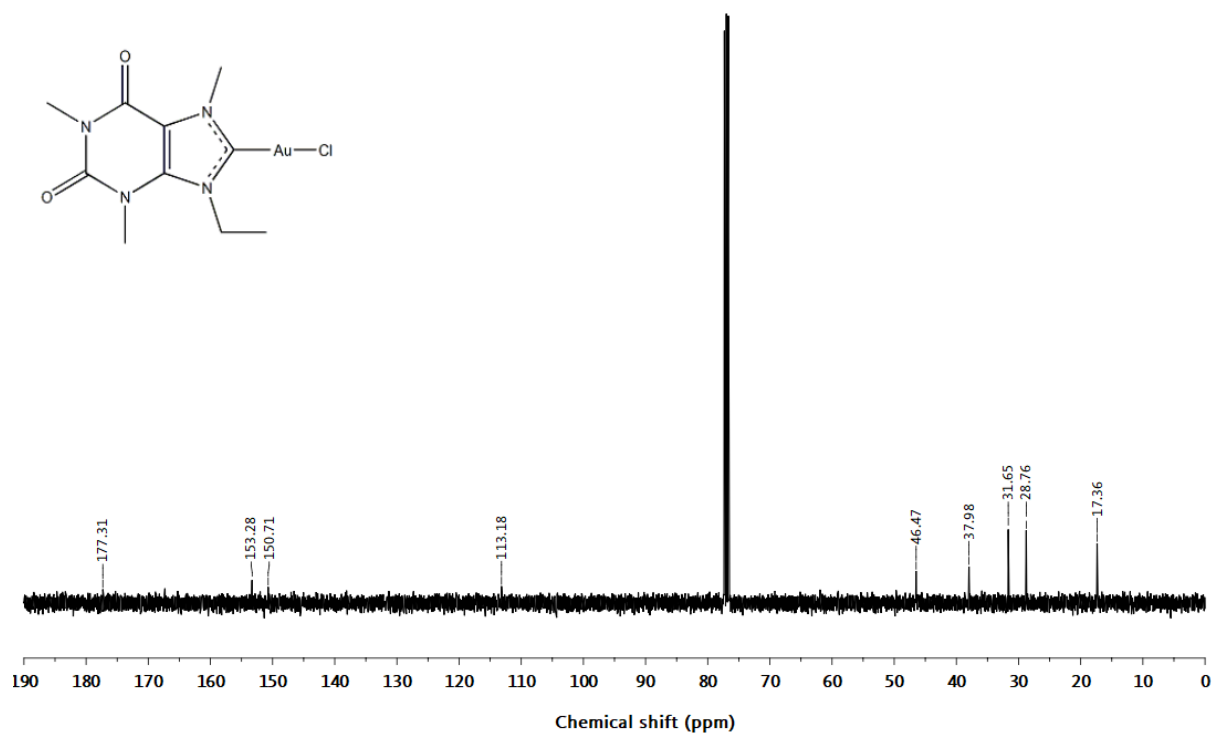

Figure S70
